# Supplementary material
Source: PubMed Central journal article supplement (PMC7426091)
Supplement: mmc1.pdf [file mmc1.pdf]

# THE LANCET

## Diabetes & Endocrinology

### Supplementary appendix

This appendix formed part of the original submission and has been peer reviewed. We post it as supplied by the authors.

Supplement to: Holman N, Knighton P, Kar P, et al. Risk factors for COVID-19-related mortality in people with type 1 and type 2 diabetes in England: a population-based cohort study. *Lancet Diabetes Endocrinol* 2020; published online August 13. [https://doi.org/10.1016/S2213-8587\(20\)30271-0](https://doi.org/10.1016/S2213-8587(20)30271-0).

## Supplementary information

### National Diabetes Audit

The National Diabetes Audit (NDA) collates data on nearly all people with diagnosed diabetes registered with a healthcare provider in England. Individuals are included if they have a valid code for diabetes mellitus (excluding gestational diabetes) in their electronic health record. Diagnosis of diabetes is based on usual clinical practice in England which follows guidance from the National Institute for Health and Clinical Excellence who recommend that diagnosis is based on a HbA1c persistently above 48mmol/mol, a random glucose of 11.1mmol/L or more, a 2-hour post 75gram glucose load of 11.1mmol/l or more, or a fasting glucose of 7.0mmol/l or more. Demographic and clinical data are extracted from general practice electronic clinical systems using the General Practice Extraction Service (a national centralised data collection service). This is supplemented by data submitted by specialist diabetes services. Each person with diabetes is identified by a unique NHS number. Data from general practices in England is available from 1<sup>st</sup> April 2003 to 31<sup>st</sup> December 2019. For the period 1<sup>st</sup> January 2018 to 31<sup>st</sup> March 2019 data was collected from 98% of general practices in England. Data was submitted by 113 specialist diabetes services.

Data on demographic characteristics and clinical markers of cardiovascular risk and co-morbidity is extracted from clinical systems. This clinical record data is linked to Hospital Episode Statistics (HES) for data on hospital admissions and discharge diagnoses and to Office of National Statistics data for dates and causes of death. Type of diabetes was based on the coded diagnostic information recorded in clinical records. Where there were inconsistencies in the type of diabetes recorded over time or in different settings the code most recently assigned by a specialist service was used if available or the most recently recorded code noted in primary care if not.

**Table S1: Age-sex and multiply adjusted hazard ratios for COVID-19 related mortality by risk factors in people with Type 1 and Type 2 diabetes**

|                                   | Type 1                                  |                                           | Type 2                                  |                                           |
|-----------------------------------|-----------------------------------------|-------------------------------------------|-----------------------------------------|-------------------------------------------|
|                                   | Adjusted for age and sex<br>HR (95% CI) | Adjusted for all variables<br>HR (95% CI) | Adjusted for age and sex<br>HR (95% CI) | Adjusted for all variables<br>HR (95% CI) |
| <b>Deprivation</b>                |                                         |                                           |                                         |                                           |
| Most deprived                     | 2.93 (2.11 - 4.07)                      | 1.93 (1.36 - 2.72)                        | 1.75 (1.64 - 1.86)                      | 1.46 (1.37 - 1.56)                        |
| 2nd most deprived                 | 2.30 (1.64 - 3.23)                      | 1.59 (1.13 - 2.25)                        | 1.54 (1.45 - 1.65)                      | 1.28 (1.20 - 1.37)                        |
| 3rd most deprived                 | 2.20 (1.57 - 3.09)                      | 1.82 (1.30 - 2.56)                        | 1.18 (1.11 - 1.27)                      | 1.08 (1.01 - 1.16)                        |
| 2nd Least deprived                | 1.33 (0.92 - 1.93)                      | 1.22 (0.84 - 1.76)                        | 1.05 (0.98 - 1.13)                      | 1.01 (0.94 - 1.08)                        |
| Least deprived                    | 1.00                                    | 1.00                                      | 1.00                                    | 1.00                                      |
| <b>Ethnic group</b>               |                                         |                                           |                                         |                                           |
| Asian                             | 2.29 (1.74 - 3.02)                      | 1.08 (1.16 - 2.12)                        | 1.45 (1.36 - 1.53)                      | 1.08 (1.01 - 1.15)                        |
| Black                             | 2.90 (2.13 - 3.95)                      | 1.77 (1.25 - 2.49)                        | 2.38 (2.21 - 2.55)                      | 1.63 (1.51 - 1.77)                        |
| Mixed                             | 1.36 (0.51 - 3.64)                      | 0.86 (0.32 - 2.33)                        | 1.78 (1.5 - 2.11)                       | 1.30 (1.10 - 1.55)                        |
| Other                             | 2.29 (1.25 - 4.17)                      | 1.89 (1.03 - 3.47)                        | 1.23 (1.05 - 1.43)                      | 1.01 (0.86 - 1.18)                        |
| White                             | 1.00                                    | 1.00                                      | 1.00                                    | 1.00                                      |
| Missing                           | 0.91 (0.62 - 1.35)                      | 1.13 (0.76 - 1.67)                        | 0.70 (0.65 - 0.75)                      | 0.80 (0.75 - 0.86)                        |
| <b>HbA1c</b>                      |                                         |                                           |                                         |                                           |
| <48 mmol/mol                      | 1.55 (1.02 - 2.37)                      | 1.37 (0.89 - 2.09)                        | 1.19 (1.12 - 1.26)                      | 1.11 (1.05 - 1.18)                        |
| 48-53 mmol/mol                    | 1.00                                    | 1.00                                      | 1.00                                    | 1.00                                      |
| 54-58 mmol/mol                    | 0.74 (0.46 - 1.19)                      | 0.78 (0.48 - 1.25)                        | 1.09 (1.02 - 1.18)                      | 1.05 (0.97 - 1.13)                        |
| 59-74 mmol/mol                    | 1.12 (0.78 - 1.60)                      | 1.16 (0.81 - 1.67)                        | 1.38 (1.29 - 1.47)                      | 1.22 (1.15 - 1.30)                        |
| 75-85 mmol/mol                    | 1.39 (0.92 - 2.10)                      | 1.37 (0.90 - 2.07)                        | 1.69 (1.54 - 1.85)                      | 1.36 (1.24 - 1.50)                        |
| ≥86 mmol/mol                      | 2.57 (1.74 - 3.80)                      | 2.23 (1.50 - 3.3)                         | 2.12 (1.94 - 2.31)                      | 1.61 (1.47 - 1.77)                        |
| Missing                           | 2.11 (1.43 - 3.11)                      | 1.48 (0.94 - 2.32)                        | 1.96 (1.83 - 2.10)                      | 1.20 (1.1 - 1.31)                         |
| <b>Duration of diagnosis</b>      |                                         |                                           |                                         |                                           |
| <1 year                           | 5.80 (0.65 - 51.92)                     | 5.81 (0.65 - 52.08)                       | 0.99 (0.75 - 1.30)                      | 1.01 (0.77 - 1.34)                        |
| 1-2 years                         | 1.66 (0.47 - 5.90)                      | 1.63 (0.46 - 5.76)                        | 0.89 (0.80 - 0.98)                      | 0.89 (0.81 - 0.98)                        |
| 3-4 years                         | 1.00                                    | 1.00                                      | 1.00                                    | 1.00                                      |
| 5-9 years                         | 1.69 (0.57 - 4.99)                      | 1.60 (0.54 - 4.73)                        | 1.02 (0.94 - 1.11)                      | 1.00 (0.92 - 1.08)                        |
| 10-14 years                       | 2.65 (0.95 - 7.36)                      | 2.17 (0.78 - 6.06)                        | 1.15 (1.06 - 1.24)                      | 1.04 (0.97 - 1.13)                        |
| 15-19 years                       | 3.79 (1.39 - 10.29)                     | 2.79 (1.02 - 7.61)                        | 1.47 (1.36 - 1.59)                      | 1.19 (1.10 - 1.29)                        |
| ≥20 years                         | 2.53 (0.94 - 6.80)                      | 2.08 (0.77 - 5.63)                        | 1.84 (1.70 - 1.99)                      | 1.26 (1.16 - 1.37)                        |
| <b>eGFR</b>                       |                                         |                                           |                                         |                                           |
| ≥90 ml/min/1.73m <sup>2.2</sup>   | 1.00                                    | 1.00                                      | 1.00                                    | 1.00                                      |
| 60-89 ml/min/1.73m <sup>2</sup>   | 1.15 (0.86 - 1.55)                      | 1.17 (0.87 - 1.57)                        | 0.98 (0.92 - 1.03)                      | 1.02 (0.96 - 1.08)                        |
| 45-59 ml/min/1.73m <sup>2</sup>   | 2.40 (1.73 - 3.34)                      | 2.07 (1.48 - 2.89)                        | 1.45 (1.36 - 1.55)                      | 1.39 (1.3 - 1.49)                         |
| 30-44 ml/min/1.73m <sup>2</sup>   | 3.18 (2.25 - 4.5)                       | 2.46 (1.72 - 3.52)                        | 2.08 (1.94 - 2.23)                      | 1.76 (1.63 - 1.89)                        |
| 15-29 ml/min/1.73m <sup>2</sup>   | 5.30 (3.57 - 7.85)                      | 3.71 (2.47 - 5.58)                        | 3.19 (2.91 - 3.50)                      | 2.31 (2.1 - 2.54)                         |
| <15 ml/min/1.73m <sup>2</sup>     | 14.09 (9.49 - 20.91)                    | 8.35 (5.50 - 12.70)                       | 8.55 (7.59 - 9.65)                      | 4.91 (4.34 - 5.56)                        |
| Missing                           | 2.55 (1.54 - 4.22)                      | 1.75 (1.01 - 3.02)                        | 1.54 (1.34 - 1.78)                      | 0.82 (0.71 - 0.96)                        |
| <b>Body mass index</b>            |                                         |                                           |                                         |                                           |
| <20 kg/m <sup>2</sup>             | 2.43 (1.6 - 3.71)                       | 2.45 (1.60 - 3.75)                        | 2.52 (2.29 - 2.78)                      | 2.33 (2.11 - 2.56)                        |
| 20-24.9 kg/m <sup>2</sup>         | 1.48 (1.13 - 1.93)                      | 1.51 (1.15 - 1.98)                        | 1.37 (1.29 - 1.44)                      | 1.34 (1.27 - 1.42)                        |
| 25-29.9 kg/m <sup>2</sup>         | 1.00                                    | 1.00                                      | 1.00                                    | 1.00                                      |
| 30-34.9 kg/m <sup>2</sup>         | 1.67 (1.27 - 2.20)                      | 1.47 (1.12 - 1.94)                        | 1.07 (1.01 - 1.13)                      | 1.04 (0.98 - 1.10)                        |
| 35-39.9 kg/m <sup>2</sup>         | 2.14 (1.50 - 3.04)                      | 1.72 (1.21 - 2.46)                        | 1.26 (1.18 - 1.36)                      | 1.17 (1.08 - 1.26)                        |
| ≥40 kg/m <sup>2</sup>             | 3.13 (2.07 - 4.74)                      | 2.33 (1.53 - 3.56)                        | 1.82 (1.67 - 1.99)                      | 1.6 (1.47 - 1.75)                         |
| Missing                           | 2.51 (1.79 - 3.52)                      | 2 (1.40 - 2.86)                           | 2.22 (2.08 - 2.38)                      | 1.89 (1.76 - 2.03)                        |
| <b>Systolic blood pressure</b>    |                                         |                                           |                                         |                                           |
| ≤140 mmHg                         | 1.00                                    | 1.00                                      | 1.00                                    | 1.00                                      |
| >140 mmHg                         | 0.94 (0.76 - 1.16)                      | 1.1 (0.83 - 1.46)                         | 0.89 (0.85 - 0.93)                      | 1.03 (0.97 - 1.09)                        |
| Missing                           | 1.00 (0.72 - 1.40)                      | 1.35 (1.01 - 1.79)                        | 1.03 (0.96 - 1.11)                      | 1.67 (1.57 - 1.78)                        |
| <b>On anti-hypertensive drugs</b> |                                         |                                           |                                         |                                           |
| Yes                               | 1.60 (1.21 - 2.13)                      | 1.10 (0.81 - 1.49)                        | 1.27 (1.19 - 1.35)                      | 1.09 (1.02 - 1.16)                        |
| No                                | 1.00                                    | 1.00                                      | 1.00                                    | 1.00                                      |
| Missing                           | 2.82 (1.22 - 6.52)                      | -                                         | 1.38 (1.1 - 1.72)                       | -                                         |
| <b>Total cholesterol</b>          |                                         |                                           |                                         |                                           |
| <5 mmol/l                         | 1.00                                    | 1.00                                      | 1.00                                    | 1.00                                      |
| ≥5 mmol/l                         | 1.12 (0.85 - 1.47)                      | 0.85 (0.69 - 1.05)                        | 1.07 (1.01 - 1.13)                      | 0.86 (0.82 - 0.9)                         |
| Missing                           | 1.68 (1.35 - 2.09)                      | 0.71 (0.48 - 1.06)                        | 1.83 (1.75 - 1.92)                      | 0.72 (0.66 - 0.79)                        |
| <b>On statins</b>                 |                                         |                                           |                                         |                                           |
| Yes                               | 0.91 (0.73 - 1.13)                      | 0.82 (0.65 - 1.03)                        | 0.74 (0.71 - 0.77)                      | 0.72 (0.69 - 0.75)                        |
| No                                | 1.00                                    | 1.00                                      | 1.00                                    | 1.00                                      |
| Missing                           | 1.8 (0.79 - 4.08)                       | 1.34 (0.54 - 3.31)                        | 0.90 (0.72 - 1.11)                      | 0.67 (0.53 - 0.85)                        |

|                        |                    |                    |                    |                    |
|------------------------|--------------------|--------------------|--------------------|--------------------|
| <b>Smoking</b>         |                    |                    |                    |                    |
| Current smoker         | 0.98 (0.7 - 1.37)  | 0.88 (0.62 - 1.25) | 0.66 (0.61 - 0.72) | 0.67 (0.62 - 0.74) |
| Ex-smoker              | 1.07 (0.88 - 1.31) | 1.09 (0.89 - 1.35) | 1.04 (1.00 - 1.08) | 1.13 (1.08 - 1.18) |
| Non-smoker*            | 1.12 (0.63 - 2.00) | 1.03 (0.58 - 1.85) | 1.46 (1.29 - 1.64) | 1.28 (1.14 - 1.45) |
| Never smoked           | 1.00               | 1.00               | 1.00               | 1.00               |
| Missing                | -                  | 0 (0 - 2.63E+191)  | 2.91 (1.83 - 4.63) | 2.11 (1.33 - 3.36) |
| <b>Co-morbidities</b>  |                    |                    |                    |                    |
| Previous MI            | 2.42 (1.68 - 3.49) | 1.25 (0.85 - 1.84) | 1.91 (1.73 - 2.1)  | 1.11 (1.00 - 1.23) |
| Previous stroke        | 3.42 (2.55 - 4.6)  | 2.33 (1.72 - 3.15) | 2.59 (2.41 - 2.78) | 2.02 (1.88 - 2.17) |
| Previous heart failure | 3.51 (2.81 - 4.39) | 1.80 (1.41 - 2.29) | 2.99 (2.84 - 3.13) | 2.09 (1.99 - 2.21) |

\* This category is used where an individual is not currently a smoker but their history is unknown therefore interpretation of the results is complex.

- indicates that small number of cases in this category meant that it was not possible to calculate a HR with appropriate CI

**Table S2: Adjusted hazard ratios for COVID-19 related and not COVID-19 related deaths in people with Type 1 (n=264,390) and Type 2 diabetes (n=2,874,020) in England, 16<sup>th</sup> February 2020 to 11<sup>th</sup> May 2020**

|                                 | COVID-19 related deaths |                       | Not COVID-19 related deaths |                       |
|---------------------------------|-------------------------|-----------------------|-----------------------------|-----------------------|
|                                 | Type 1<br>HR (95% CI)   | Type 2<br>HR (95% CI) | Type 1<br>HR (95% CI)       | Type 2<br>HR (95% CI) |
| Number of deaths                | 464                     | 10,525                | 1142                        | 25,787                |
| Sex                             |                         |                       |                             |                       |
| Male                            | 1.61 (1.32 - 1.96)      | 1.61 (1.54 - 1.67)    | 1.24 (1.09 - 1.40)          | 1.18 (1.15 - 1.22)    |
| Female                          | 1.00                    | 1.00                  | 1.00                        | 1.00                  |
| Age                             |                         |                       |                             |                       |
| <40                             | 0.03 (0.01 - 0.07)      | 0.18 (0.12 - 0.27)    | 0.08 (0.06 - 0.12)          | 0.12 (0.09 - 0.17)    |
| 40-49                           | 0.19 (0.11 - 0.32)      | 0.25 (0.20 - 0.31)    | 0.28 (0.21 - 0.39)          | 0.21 (0.18 - 0.25)    |
| 50-59                           | 0.52 (0.37 - 0.73)      | 0.52 (0.47 - 0.58)    | 0.51 (0.40 - 0.65)          | 0.49 (0.45 - 0.53)    |
| 60-69                           | 1.00                    | 1.00                  | 1.00                        | 1.00                  |
| 70-79                           | 1.89 (1.42 - 2.52)      | 1.94 (1.81 - 2.08)    | 2.48 (2.04 - 3.00)          | 2.03 (1.93 - 2.13)    |
| 80+                             | 4.79 (3.62 - 6.32)      | 4.52 (4.23 - 4.84)    | 5.99 (4.95 - 7.24)          | 4.95 (4.72 - 5.19)    |
| Deprivation                     |                         |                       |                             |                       |
| Most deprived                   | 1.93 (1.36 - 2.72)      | 1.46 (1.37 - 1.56)    | 1.35 (1.12 - 1.64)          | 1.26 (1.21 - 1.32)    |
| 2nd most deprived               | 1.59 (1.13 - 2.25)      | 1.28 (1.20 - 1.37)    | 1.05 (0.86 - 1.28)          | 1.14 (1.09 - 1.19)    |
| 3rd most deprived               | 1.82 (1.30 - 2.56)      | 1.08 (1.01 - 1.16)    | 1.04 (0.86 - 1.27)          | 1.08 (1.04 - 1.13)    |
| 2nd Least deprived              | 1.22 (0.84 - 1.76)      | 1.01 (0.94 - 1.08)    | 0.98 (0.81 - 1.20)          | 1.02 (0.97 - 1.06)    |
| Least deprived                  | 1.00                    | 1.00                  | 1.00                        | 1.00                  |
| Region                          |                         |                       |                             |                       |
| London                          | 2.30 (1.57 - 3.35)      | 1.69 (1.57 - 1.81)    | 1.17 (0.92 - 1.49)          | 0.92 (1.49 - 1.01)    |
| South West                      | 0.90 (0.56 - 1.45)      | 0.61 (0.55 - 0.67)    | 1.03 (0.81 - 1.32)          | 1.04 (0.99 - 1.10)    |
| South East                      | 1.00                    | 1.00                  | 1.00                        | 1.00                  |
| Midlands                        | 1.46 (1.01 - 2.09)      | 1.03 (0.96 - 1.11)    | 1.11 (0.91 - 1.36)          | 1.09 (1.05 - 1.14)    |
| East of England                 | 1.90 (1.28 - 2.82)      | 0.96 (0.89 - 1.05)    | 1.15 (0.92 - 1.46)          | 1.05 (1.00 - 1.11)    |
| North West                      | 1.64 (1.09 - 2.49)      | 1.17 (1.08 - 1.26)    | 1.04 (0.82 - 1.32)          | 1.09 (1.04 - 1.15)    |
| North East                      | 1.15 (0.77 - 1.74)      | 0.96 (0.89 - 1.03)    | 1.11 (0.89 - 1.38)          | 1.13 (1.08 - 1.19)    |
| Ethnic group                    |                         |                       |                             |                       |
| Asian                           | 1.57 (1.16 - 2.12)      | 1.08 (1.01 - 1.15)    | 0.71 (0.54 - 0.92)          | 0.56 (0.53 - 0.59)    |
| Black                           | 1.77 (1.25 - 2.49)      | 1.63 (1.51 - 1.77)    | 0.94 (0.70 - 1.27)          | 0.75 (0.69 - 0.81)    |
| Mixed                           | 0.86 (0.32 - 2.33)      | 1.30 (1.10 - 1.55)    | 0.91 (0.48 - 1.70)          | 0.65 (0.55 - 0.76)    |
| Other                           | 1.89 (1.03 - 3.47)      | 1.01 (0.86 - 1.18)    | 0.55 (0.28 - 1.11)          | 0.72 (0.64 - 0.81)    |
| White                           | 1.00                    | 1.00                  | 1.00                        | 1.00                  |
| Missing                         | 1.13 (0.76 - 1.67)      | 0.80 (0.75 - 0.86)    | 0.88 (0.69 - 1.12)          | 0.85 (0.82 - 0.88)    |
| HbA1c                           |                         |                       |                             |                       |
| <48 mmol/mol                    | 1.37 (0.89 - 2.09)      | 1.11 (1.05 - 1.18)    | 1.23 (0.94 - 1.61)          | 1.27 (1.22 - 1.32)    |
| 48-53 mmol/mol                  | 1.00                    | 1.00                  | 1.00                        | 1.00                  |
| 54-58 mmol/mol                  | 0.78 (0.48 - 1.25)      | 1.05 (0.97 - 1.13)    | 0.87 (0.65 - 1.15)          | 0.97 (0.92 - 1.02)    |
| 59-74 mmol/mol                  | 1.16 (0.81 - 1.67)      | 1.22 (1.15 - 1.30)    | 0.98 (0.78 - 1.23)          | 1.09 (1.04 - 1.14)    |
| 75-85 mmol/mol                  | 1.37 (0.90 - 2.07)      | 1.36 (1.24 - 1.50)    | 1.18 (0.91 - 1.53)          | 1.25 (1.17 - 1.33)    |
| ≥86 mmol/mol                    | 2.23 (1.50 - 3.30)      | 1.61 (1.47 - 1.77)    | 1.90 (1.48 - 2.44)          | 1.42 (1.33 - 1.51)    |
| Missing                         | 1.48 (0.94 - 2.32)      | 1.20 (1.10 - 1.31)    | 1.28 (0.97 - 1.69)          | 1.30 (1.24 - 1.37)    |
| Duration of diagnosis           |                         |                       |                             |                       |
| <1 year                         | 5.81 (0.65 - 52.08)     | 1.01 (0.77 - 1.34)    | 0.92 (0.12 - 6.82)          | 0.92 (0.76 - 1.12)    |
| 1-2 years                       | 1.63 (0.46 - 5.76)      | 0.89 (0.81 - 0.98)    | 1.00 (0.56 - 1.79)          | 1.02 (0.96 - 1.09)    |
| 3-4 years                       | 1.00                    | 1.00                  | 1.00                        | 1.00                  |
| 5-9 years                       | 1.60 (0.54 - 4.73)      | 1.00 (0.92 - 1.08)    | 1.19 (0.75 - 1.89)          | 1.09 (1.04 - 1.15)    |
| 10-14 years                     | 2.17 (0.78 - 6.06)      | 1.04 (0.97 - 1.13)    | 0.91 (0.58 - 1.43)          | 1.19 (1.13 - 1.26)    |
| 15-19 years                     | 2.79 (1.02 - 7.61)      | 1.19 (1.10 - 1.29)    | 0.89 (0.57 - 1.37)          | 1.33 (1.27 - 1.40)    |
| ≥20 years                       | 2.08 (0.77 - 5.63)      | 1.26 (1.16 - 1.37)    | 1.06 (0.70 - 1.60)          | 1.51 (1.43 - 1.60)    |
| eGFR                            |                         |                       |                             |                       |
| ≥90 ml/min/1.73m <sup>22</sup>  | 1.00                    | 1.00                  | 1.00                        | 1.00                  |
| 60-89 ml/min/1.73m <sup>2</sup> | 1.17 (0.87 - 1.57)      | 1.02 (0.96 - 1.08)    | 0.99 (0.83 - 1.18)          | 0.81 (0.78 - 0.84)    |
| 45-59 ml/min/1.73m <sup>2</sup> | 2.07 (1.48 - 2.89)      | 1.39 (1.30 - 1.49)    | 1.23 (0.99 - 1.53)          | 1.08 (1.04 - 1.13)    |
| 30-44 ml/min/1.73m <sup>2</sup> | 2.46 (1.72 - 3.52)      | 1.76 (1.63 - 1.89)    | 1.73 (1.39 - 2.16)          | 1.38 (1.32 - 1.45)    |
| 15-29 ml/min/1.73m <sup>2</sup> | 3.71 (2.47 - 5.58)      | 2.31 (2.10 - 2.54)    | 3.11 (2.43 - 3.97)          | 2.07 (1.96 - 2.19)    |
| <15 ml/min/1.73m <sup>2</sup>   | 8.35 (5.50 - 12.7)      | 4.91 (4.34 - 5.56)    | 5.93 (4.52 - 7.79)          | 3.37 (3.09 - 3.69)    |
| Missing                         | 1.75 (1.01 - 3.02)      | 0.82 (0.71 - 0.96)    | 0.86 (0.59 - 1.25)          | 0.91 (0.83 - 1.00)    |
| Body mass index                 |                         |                       |                             |                       |
| <20 kg/m <sup>2</sup>           | 2.45 (1.60 - 3.75)      | 2.33 (2.11 - 2.56)    | 2.95 (2.36 - 3.68)          | 3.38 (3.22 - 3.56)    |
| 20-24.9 kg/m <sup>2</sup>       | 1.51 (1.15 - 1.98)      | 1.34 (1.27 - 1.42)    | 1.42 (1.21 - 1.67)          | 1.61 (1.56 - 1.67)    |
| 25-29.9 kg/m <sup>2</sup>       | 1.00                    | 1.00                  | 1.00                        | 1.00                  |
| 30-34.9 kg/m <sup>2</sup>       | 1.47 (1.12 - 1.94)      | 1.04 (0.98 - 1.10)    | 0.85 (0.70 - 1.03)          | 0.83 (0.80 - 0.86)    |

|                            |                    |                    |                    |                    |
|----------------------------|--------------------|--------------------|--------------------|--------------------|
| 35-39.9 kg/m <sup>2</sup>  | 1.72 (1.21 - 2.46) | 1.17 (1.08 - 1.26) | 1.21 (0.95 - 1.54) | 0.83 (0.79 - 0.88) |
| ≥40 kg/m <sup>2</sup>      | 2.33 (1.53 - 3.56) | 1.60 (1.47 - 1.75) | 1.45 (1.08 - 1.94) | 1.14 (1.07 - 1.21) |
| Missing                    | 2.00 (1.40 - 2.86) | 1.89 (1.76 - 2.03) | 1.71 (1.37 - 2.14) | 1.70 (1.62 - 1.78) |
| Systolic blood pressure    |                    |                    |                    |                    |
| ≤140                       | 1.00               | 1.00               | 1.00               | 1.00               |
| >140                       | 0.85 (0.69 - 1.05) | 0.86 (0.82 - 0.90) | 0.85 (0.74 - 0.98) | 0.83 (0.8 - 0.85)  |
| Missing                    | 0.71 (0.48 - 1.06) | 0.72 (0.66 - 0.79) | 0.91 (0.72 - 1.15) | 0.74 (0.7 - 0.78)  |
| On anti-hypertensive drugs |                    |                    |                    |                    |
| Yes                        | 1.10 (0.81 - 1.49) | 1.09 (1.02 - 1.16) | 1.72 (1.40 - 2.10) | 1.20 (1.15 - 1.25) |
| No                         | 1.00               | 1.00               | 1.00               | 1.00               |
| Missing                    | -                  | -                  | -                  | -                  |
| Total cholesterol          |                    |                    |                    |                    |
| ≤5mmol/l                   | 1.00               | 1.00               | 1.00               | 1.00               |
| >5mmol/l                   | 1.10 (0.83 - 1.46) | 1.03 (0.97 - 1.09) | 0.91 (0.76 - 1.1)  | 0.95 (0.91 - 0.99) |
| Missing                    | 1.35 (1.01 - 1.79) | 1.67 (1.57 - 1.78) | 1.48 (1.25 - 1.75) | 1.64 (1.58 - 1.71) |
| On statins                 |                    |                    |                    |                    |
| Yes                        | 0.82 (0.65 - 1.03) | 0.72 (0.69 - 0.75) | 0.67 (0.59 - 0.77) | 0.64 (0.62 - 0.66) |
| No                         | 1.00               | 1.00               | 1.00               | 1.00               |
| Missing                    | 1.34 (0.54 - 3.31) | 0.67 (0.53 - 0.85) | 1.51 (0.86 - 2.63) | 0.83 (0.73 - 0.95) |
| Smoking                    |                    |                    |                    |                    |
| Current smoker             | 0.88 (0.62 - 1.25) | 0.67 (0.62 - 0.74) | 1.53 (1.26 - 1.85) | 1.40 (1.34 - 1.47) |
| Ex-smoker                  | 1.09 (0.89 - 1.35) | 1.13 (1.08 - 1.18) | 1.24 (1.09 - 1.42) | 1.16 (1.13 - 1.19) |
| *Non-smoker                | 1.03 (0.58 - 1.85) | 1.28 (1.14 - 1.45) | 1.40 (1.00 - 1.96) | 1.33 (1.23 - 1.43) |
| Never smoked               | 1.00               | 1.00               | 1.00               | 1.00               |
| Missing                    | -                  | 2.11 (1.33 - 3.36) | 0.26 (0.06 - 1.11) | 1.49 (1.03 - 2.16) |
| Co-morbidities             |                    |                    |                    |                    |
| Previous MI                | 1.25 (0.85 - 1.84) | 1.11 (1.00 - 1.23) | 1.43 (1.14 - 1.79) | 1.26 (1.18 - 1.33) |
| Previous stroke            | 2.33 (1.72 - 3.15) | 2.02 (1.88 - 2.17) | 1.68 (1.36 - 2.07) | 1.83 (1.75 - 1.92) |
| Previous heart failure     | 1.80 (1.41 - 2.29) | 2.09 (1.99 - 2.21) | 2.43 (2.09 - 2.84) | 2.60 (2.52 - 2.69) |

\*Please note also that whilst we included the category 'non-smokers', Table 1 shows that this group is <3% of all categories. We suspect this group is mostly ex-smokers but because the data comes from routinely recorded clinical records, we do not have definitive information (some could be never smokers). For avoidance of confusion, we have left their data out of the figures.

**Table S3: Sensitivity analysis examining adjusted hazard ratios for COVID-19 related death in people with Type 1 and Type 2 diabetes stratified by type of classification of cause of death**

|                    | Type 1                       |                                      |                           | Type 2                       |                                   |                           |
|--------------------|------------------------------|--------------------------------------|---------------------------|------------------------------|-----------------------------------|---------------------------|
|                    | Base analysis<br>HR (95% CI) | Primary cause<br>only<br>HR (95% CI) | U07.1 only<br>HR (95% CI) | Base analysis<br>HR (95% CI) | Primary cause only<br>HR (95% CI) | U07.1 only<br>HR (95% CI) |
| Number of deaths   | 464                          | 432                                  | 437                       | 10525                        | 9991                              | 9783                      |
| Sex                |                              |                                      |                           |                              |                                   |                           |
| Male               | 1.61 (1.32 - 1.96)           | 1.62 (1.32 - 1.99)                   | 1.67 (1.37 - 2.05)        | 1.61 (1.54 - 1.67)           | 1.61 (1.54 - 1.68)                | 1.64 (1.57 - 1.71)        |
| Female             | 1.00                         | 1.00                                 | 1.00                      | 1.00                         | 1.00                              | 1.00                      |
| Age                |                              |                                      |                           |                              |                                   |                           |
| <40                | 0.03 (0.01 - 0.07)           | 0.03 (0.01 - 0.08)                   | 0.03 (0.01 - 0.08)        | 0.18 (0.12 - 0.27)           | 0.18 (0.12 - 0.27)                | 0.19 (0.12 - 0.28)        |
| 40-49              | 0.19 (0.11 - 0.32)           | 0.19 (0.11 - 0.34)                   | 0.19 (0.11 - 0.33)        | 0.25 (0.2 - 0.31)            | 0.25 (0.20 - 0.30)                | 0.26 (0.21 - 0.32)        |
| 50-59              | 0.52 (0.37 - 0.73)           | 0.47 (0.33 - 0.69)                   | 0.53 (0.38 - 0.76)        | 0.52 (0.47 - 0.58)           | 0.53 (0.47 - 0.59)                | 0.53 (0.48 - 0.59)        |
| 60-69              | 1.00                         | 1.00                                 | 1.00                      | 1.00                         | 1.00                              | 1.00                      |
| 70-79              | 1.89 (1.42 - 2.52)           | 1.96 (1.45 - 2.64)                   | 1.88 (1.40 - 2.52)        | 1.94 (1.81 - 2.08)           | 1.95 (1.82 - 2.09)                | 1.92 (1.79 - 2.06)        |
| ≥80                | 4.79 (3.62 - 6.32)           | 5.13 (3.84 - 6.85)                   | 4.55 (3.42 - 6.06)        | 4.52 (4.23 - 4.84)           | 4.59 (4.29 - 4.92)                | 4.35 (4.06 - 4.66)        |
| Deprivation        |                              |                                      |                           |                              |                                   |                           |
| Most deprived      | 1.93 (1.36 - 2.72)           | 1.91 (1.34 - 2.73)                   | 1.81 (1.28 - 2.58)        | 1.46 (1.37 - 1.56)           | 1.46 (1.36 - 1.56)                | 1.47 (1.37 - 1.58)        |
| 2nd most deprived  | 1.59 (1.13 - 2.25)           | 1.55 (1.08 - 2.22)                   | 1.52 (1.07 - 2.16)        | 1.28 (1.2 - 1.37)            | 1.27 (1.19 - 1.36)                | 1.29 (1.20 - 1.38)        |
| 3rd most deprived  | 1.82 (1.3 - 2.56)            | 1.81 (1.28 - 2.58)                   | 1.72 (1.21 - 2.43)        | 1.08 (1.01 - 1.16)           | 1.08 (1.00 - 1.15)                | 1.08 (1.01 - 1.16)        |
| 2nd Least deprived | 1.22 (0.84 - 1.76)           | 1.22 (0.83 - 1.79)                   | 1.19 (0.81 - 1.72)        | 1.01 (0.94 - 1.08)           | 1.00 (0.93 - 1.07)                | 1 (0.93 - 1.08)           |
| Least deprived     | 1.00                         | 1.00                                 | 1.00                      | 1.00                         | 1.00                              | 1.00                      |
| Missing            | -                            | -                                    | -                         | 1.7 (0.81 - 3.59)            | 1.56 (0.7 - 3.48)                 | 1.67 (0.75 - 3.73)        |
| Region             |                              |                                      |                           |                              |                                   |                           |
| London             | 2.30 (1.57 - 3.35)           | 2.31 (1.56 - 3.42)                   | 2.41 (1.62 - 3.57)        | 1.69 (1.57 - 1.81)           | 1.71 (1.59 - 1.85)                | 1.8 (1.67 - 1.94)         |
| South West         | 0.90 (0.56 - 1.45)           | 0.87 (0.52 - 1.44)                   | 0.93 (0.56 - 1.54)        | 0.61 (0.55 - 0.67)           | 0.62 (0.56 - 0.69)                | 0.62 (0.56 - 0.68)        |
| South East         | 1.00                         | 1.00                                 | 1.00                      | 1.00                         | 1.00                              | 1.00                      |
| Midlands           | 1.46 (1.01 - 2.09)           | 1.42 (0.97 - 2.07)                   | 1.54 (1.05 - 2.25)        | 1.03 (0.96 - 1.11)           | 1.05 (0.97 - 1.12)                | 1.11 (1.03 - 1.19)        |
| East of England    | 1.90 (1.28 - 2.82)           | 2.00 (1.33 - 3.01)                   | 2.04 (1.35 - 3.08)        | 0.96 (0.89 - 1.05)           | 0.97 (0.89 - 1.06)                | 1.05 (0.96 - 1.15)        |
| North West         | 1.64 (1.09 - 2.49)           | 1.68 (1.09 - 2.58)                   | 1.75 (1.14 - 2.69)        | 1.17 (1.08 - 1.26)           | 1.19 (1.1 - 1.28)                 | 1.24 (1.15 - 1.35)        |
| North East         | 1.15 (0.77 - 1.74)           | 1.13 (0.74 - 1.74)                   | 1.14 (0.74 - 1.76)        | 0.96 (0.89 - 1.03)           | 0.98 (0.9 - 1.06)                 | 1.00 (0.92 - 1.08)        |
| Missing            | -                            | -                                    | -                         | -                            | -                                 | -                         |
| Ethnic group       |                              |                                      |                           |                              |                                   |                           |
| Asian              | 1.57 (1.16 - 2.12)           | 1.68 (1.24 - 2.28)                   | 1.59 (1.17 - 2.17)        | 1.08 (1.01 - 1.15)           | 1.11 (1.04 - 1.18)                | 1.11 (1.04 - 1.19)        |
| Black              | 1.77 (1.25 - 2.49)           | 1.79 (1.25 - 2.55)                   | 1.81 (1.27 - 2.58)        | 1.63 (1.51 - 1.77)           | 1.66 (1.53 - 1.80)                | 1.69 (1.56 - 1.83)        |
| Mixed              | 0.86 (0.32 - 2.33)           | 0.93 (0.34 - 2.51)                   | 0.92 (0.34 - 2.48)        | 1.30 (1.10 - 1.55)           | 1.31 (1.09 - 1.56)                | 1.33 (1.11 - 1.59)        |
| Other              | 1.89 (1.03 - 3.47)           | 1.86 (0.98 - 3.51)                   | 2.02 (1.10 - 3.71)        | 1.01 (0.86 - 1.18)           | 1.00 (0.85 - 1.18)                | 1.03 (0.88 - 1.21)        |
| White              | 1.00                         | 1.00                                 | 1.00                      | 1.00                         | 1.00                              | 1.00                      |
| Missing            | 1.13 (0.76 - 1.67)           | 1.14 (0.76 - 1.71)                   | 1.11 (0.74 - 1.67)        | 0.8 (0.75 - 0.86)            | 0.8 (0.74 - 0.86)                 | 0.81 (0.75 - 0.87)        |
| HbA1c              |                              |                                      |                           |                              |                                   |                           |
| <48 mmol/mol       | 1.37 (0.89 - 2.09)           | 1.43 (0.93 - 2.21)                   | 1.37 (0.88 - 2.12)        | 1.11 (1.05 - 1.18)           | 1.11 (1.04 - 1.18)                | 1.09 (1.03 - 1.16)        |

|                                 |                     |                     |                     |                    |                    |                    |
|---------------------------------|---------------------|---------------------|---------------------|--------------------|--------------------|--------------------|
| 48-53 mmol/mol                  | 1.00                | 1.00                | 1.00                | 1.00               | 1.00               | 1.00               |
| 54-58 mmol/mol                  | 0.78 (0.48 - 1.25)  | 0.72 (0.43 - 1.18)  | 0.82 (0.51 - 1.33)  | 1.05 (0.97 - 1.13) | 1.05 (0.97 - 1.13) | 1.04 (0.97 - 1.13) |
| 59-74 mmol/mol                  | 1.16 (0.81 - 1.67)  | 1.14 (0.78 - 1.65)  | 1.18 (0.81 - 1.71)  | 1.22 (1.15 - 1.3)  | 1.23 (1.15 - 1.31) | 1.22 (1.14 - 1.3)  |
| 75-85 mmol/mol                  | 1.37 (0.90 - 2.07)  | 1.33 (0.86 - 2.05)  | 1.31 (0.85 - 2.02)  | 1.36 (1.24 - 1.5)  | 1.38 (1.25 - 1.52) | 1.37 (1.24 - 1.51) |
| ≥86 mmol/mol                    | 2.23 (1.5 - 3.3)    | 2.32 (1.54 - 3.47)  | 2.23 (1.49 - 3.35)  | 1.61 (1.47 - 1.77) | 1.60 (1.46 - 1.76) | 1.61 (1.47 - 1.77) |
| Missing                         | 1.48 (0.94 - 2.32)  | 1.44 (0.9 - 2.29)   | 1.37 (0.86 - 2.19)  | 1.2 (1.10 - 1.31)  | 1.21 (1.11 - 1.32) | 1.18 (1.08 - 1.29) |
| Duration of diagnosis           |                     |                     |                     |                    |                    |                    |
| <1 year                         | 5.81 (0.65 - 52.08) | 7.69 (0.8 - 74.16)  | 7.6 (0.79 - 73.31)  | 1.01 (0.77 - 1.34) | 1.03 (0.78 - 1.37) | 1.01 (0.76 - 1.35) |
| 1-2 years                       | 1.63 (0.46 - 5.76)  | 2.15 (0.54 - 8.62)  | 2.17 (0.54 - 8.68)  | 0.89 (0.81 - 0.98) | 0.88 (0.79 - 0.97) | 0.88 (0.80 - 0.98) |
| 3-4 years                       | 1.00                | 1.00                | 1.00                | 1.00               | 1.00               | 1.00               |
| 5-9 years                       | 1.60 (0.54 - 4.73)  | 2.13 (0.63 - 7.24)  | 1.76 (0.51 - 6.10)  | 1.00 (0.92 - 1.08) | 1.00 (0.92 - 1.09) | 1.01 (0.93 - 1.09) |
| 10-14 years                     | 2.17 (0.78 - 6.06)  | 2.5 (0.77 - 8.10)   | 2.89 (0.90 - 9.32)  | 1.04 (0.97 - 1.13) | 1.04 (0.96 - 1.12) | 1.05 (0.97 - 1.14) |
| 15-19 years                     | 2.79 (1.02 - 7.61)  | 3.52 (1.11 - 11.15) | 3.52 (1.11 - 11.14) | 1.19 (1.10 - 1.29) | 1.19 (1.09 - 1.29) | 1.19 (1.09 - 1.29) |
| ≥20 years                       | 2.08 (0.77 - 5.63)  | 2.57 (0.82 - 8.09)  | 2.62 (0.83 - 8.24)  | 1.26 (1.16 - 1.37) | 1.25 (1.15 - 1.36) | 1.25 (1.15 - 1.37) |
| eGFR                            |                     |                     |                     |                    |                    |                    |
| ≥90 ml/min/1.73m <sup>22</sup>  | 1.00                | 1.00                | 1.00                | 1.00               | 1.00               | 1.00               |
| 60-89 ml/min/1.73m <sup>2</sup> | 1.17 (0.87 - 1.57)  | 1.18 (0.87 - 1.61)  | 1.17 (0.87 - 1.58)  | 1.02 (0.96 - 1.08) | 1.02 (0.97 - 1.08) | 1.04 (0.98 - 1.10) |
| 45-59 ml/min/1.73m <sup>2</sup> | 2.07 (1.48 - 2.89)  | 2.04 (1.44 - 2.89)  | 2.07 (1.47 - 2.91)  | 1.39 (1.30 - 1.49) | 1.40 (1.31 - 1.50) | 1.42 (1.32 - 1.52) |
| 30-44 ml/min/1.73m <sup>2</sup> | 2.46 (1.72 - 3.52)  | 2.48 (1.72 - 3.59)  | 2.35 (1.62 - 3.41)  | 1.76 (1.63 - 1.89) | 1.77 (1.65 - 1.91) | 1.80 (1.67 - 1.94) |
| 15-29 ml/min/1.73m <sup>2</sup> | 3.71 (2.47 - 5.58)  | 3.49 (2.27 - 5.37)  | 3.55 (2.32 - 5.42)  | 2.31 (2.10 - 2.54) | 2.28 (2.07 - 2.51) | 2.43 (2.21 - 2.68) |
| <15 ml/min/1.73m <sup>2</sup>   | 8.35 (5.50 - 12.7)  | 8.59 (5.58 - 13.25) | 8.50 (5.55 - 13.01) | 4.91 (4.34 - 5.56) | 4.84 (4.26 - 5.51) | 5.21 (4.6 - 5.91)  |
| Missing                         | 1.75 (1.01 - 3.02)  | 1.53 (0.85 - 2.74)  | 1.78 (1.01 - 3.12)  | 0.82 (0.71 - 0.96) | 0.8 (0.68 - 0.94)  | 0.81 (0.69 - 0.96) |
| Body mass index                 |                     |                     |                     |                    |                    |                    |
| <20 kg/m <sup>2</sup>           | 2.45 (1.6 - 3.75)   | 1.92 (1.19 - 3.10)  | 2.27 (1.44 - 3.59)  | 2.33 (2.11 - 2.56) | 2.3 (2.08 - 2.54)  | 2.19 (1.98 - 2.43) |
| 20-24.9 kg/m <sup>2</sup>       | 1.51 (1.15 - 1.98)  | 1.46 (1.10 - 1.93)  | 1.47 (1.12 - 1.95)  | 1.34 (1.27 - 1.42) | 1.34 (1.27 - 1.42) | 1.31 (1.23 - 1.39) |
| 25-29.9 kg/m <sup>2</sup>       | 1.00                | 1.00                | 1.00                | 1.00               | 1.00               | 1.00               |
| 30-34.9 kg/m <sup>2</sup>       | 1.47 (1.12 - 1.94)  | 1.50 (1.13 - 1.99)  | 1.49 (1.12 - 1.97)  | 1.04 (0.98 - 1.10) | 1.03 (0.97 - 1.09) | 1.05 (0.99 - 1.11) |
| 35-39.9 kg/m <sup>2</sup>       | 1.72 (1.21 - 2.46)  | 1.73 (1.20 - 2.50)  | 1.75 (1.22 - 2.52)  | 1.17 (1.08 - 1.26) | 1.19 (1.1 - 1.28)  | 1.19 (1.11 - 1.29) |
| ≥40 kg/m <sup>2</sup>           | 2.33 (1.53 - 3.56)  | 2.47 (1.61 - 3.80)  | 2.41 (1.57 - 3.70)  | 1.6 (1.47 - 1.75)  | 1.59 (1.46 - 1.74) | 1.61 (1.47 - 1.76) |
| Missing                         | 2.00 (1.4 - 2.86)   | 2.11 (1.47 - 3.03)  | 2.18 (1.52 - 3.12)  | 1.89 (1.76 - 2.03) | 1.88 (1.75 - 2.03) | 1.85 (1.72 - 1.99) |
| Systolic blood pressure         |                     |                     |                     |                    |                    |                    |
| ≤140 mmHg                       | 1.00                | 1.00                | 1.00                | 1.00               | 1.00               | 1.00               |
| >140 mmHg                       | 1.10 (0.83 - 1.46)  | 0.83 (0.66 - 1.03)  | 0.86 (0.69 - 1.07)  | 1.03 (0.97 - 1.09) | 0.86 (0.82 - 0.90) | 0.87 (0.83 - 0.91) |
| Missing                         | 1.35 (1.01 - 1.79)  | 0.73 (0.48 - 1.10)  | 0.69 (0.46 - 1.05)  | 1.67 (1.57 - 1.78) | 0.73 (0.67 - 0.80) | 0.71 (0.65 - 0.78) |
| On anti-hypertensive drugs      |                     |                     |                     |                    |                    |                    |
| Yes                             | 1.10 (0.81 - 1.49)  | 0.83 (0.66 - 1.03)  | 0.86 (0.69 - 1.07)  | 1.09 (1.02 - 1.16) | 0.86 (0.82 - 0.90) | 0.87 (0.83 - 0.91) |
| No                              | 1.00                | 1.00                | 1.00                | 1.00               | 1.00               | 1.00               |
| Missing                         | -                   | -                   | -                   | -                  | -                  | -                  |
| Total cholesterol               |                     |                     |                     |                    |                    |                    |
| <5 mmol/l                       | 1.00                | 1.00                | 1.00                | 1.00               | 1.00               | 1.00               |
| ≥5 mmol/l                       | 0.85 (0.69 - 1.05)  | 1.09 (0.81 - 1.46)  | 1.12 (0.84 - 1.50)  | 0.86 (0.82 - 0.90) | 1.03 (0.97 - 1.09) | 1.02 (0.96 - 1.09) |
| Missing                         | 0.71 (0.48 - 1.06)  | 1.36 (1.01 - 1.82)  | 1.36 (1.01 - 1.82)  | 0.72 (0.66 - 0.79) | 1.66 (1.56 - 1.76) | 1.63 (1.53 - 1.74) |
| On statins                      |                     |                     |                     |                    |                    |                    |
| Yes                             | 0.82 (0.65 - 1.03)  | 0.85 (0.67 - 1.08)  | 0.84 (0.66 - 1.07)  | 0.72 (0.69 - 0.75) | 0.72 (0.69 - 0.75) | 0.74 (0.70 - 0.77) |



|                        |                    |                    |                    |                    |                     |                    |
|------------------------|--------------------|--------------------|--------------------|--------------------|---------------------|--------------------|
| No                     | 1.00               | 1.00               | 1.00               | 1.00               | 1.00                | 1.00               |
| Missing                | 1.34 (0.54 - 3.31) | 1.37 (0.55 - 3.42) | 1.53 (0.61 - 3.83) | 0.67 (0.53 - 0.85) | 0.66 (0.52 - 0.84)  | 0.67 (0.52 - 0.86) |
| Smoking                |                    |                    |                    |                    |                     |                    |
| Current smoker         | 0.88 (0.62 - 1.25) | 0.87 (0.6 - 1.26)  | 0.86 (0.6 - 1.24)  | 0.67 (0.62 - 0.74) | 0.65 (0.59 - 0.71)  | 0.67 (0.61 - 0.73) |
| Ex-smoker              | 1.09 (0.89 - 1.35) | 1.09 (0.88 - 1.35) | 1.08 (0.88 - 1.34) | 1.13 (1.08 - 1.18) | 1.13 (1.08 - 1.18)  | 1.13 (1.09 - 1.19) |
| Non-smoker*            | 1.03 (0.58 - 1.85) | 1.11 (0.62 - 1.99) | 1.1 (0.61 - 1.97)  | 1.28 (1.14 - 1.45) | 1.28 (1.13 - 1.45)  | 1.24 (1.09 - 1.41) |
| Never smoked           | 1.00               | 1.00               | 1.00               | 1.00               | 1.00                | 1.00               |
| Missing                | 0 (0 - 2.63E+191)  | 0 (0 - 3.2E+199)   | 0 (0 - 2.51E+195)  | 2.11 (1.33 - 3.36) | 1.98 (1.21 - 3.24-) | 2.2 (1.37 - 3.55)  |
| Co-morbidities         |                    |                    |                    |                    |                     |                    |
| Previous MI            | 1.25 (0.85 - 1.84) | 1.27 (0.86 - 1.89) | 1.25 (0.84 - 1.86) | 1.11 (1.00 - 1.23) | 1.11 (1.00 - 1.23)  | 1.14 (1.03 - 1.26) |
| Previous stroke        | 2.33 (1.72 - 3.15) | 2.38 (1.75 - 3.25) | 2.36 (1.73 - 3.22) | 2.02 (1.88 - 2.17) | 2.06 (1.91 - 2.22)  | 2.00 (1.85 - 2.16) |
| Previous heart failure | 1.8 (1.41 - 2.29)  | 1.72 (1.34 - 2.22) | 1.81 (1.41 - 2.33) | 2.09 (1.99 - 2.21) | 2.07 (1.96 - 2.19)  | 2.12 (2.01 - 2.24) |

\* This category is used where an individual is not currently a smoker but their history is unknown therefore interpretation of the results is complex.

- indicates that small number of cases in this category meant that it was not possible to calculate a HR with appropriate CI

**Table S4: Adjusted hazard ratios for COVID-19 related death in people with Type 1 and Type 2 diabetes stratified by sex**

|                                 | Type 1                |                       | Type 2              |                       |
|---------------------------------|-----------------------|-----------------------|---------------------|-----------------------|
|                                 | Male<br>HR (95% CI)   | Female<br>HR (95% CI) | Male<br>HR (95% CI) | Female<br>HR (95% CI) |
| Deaths                          | 284                   | 180                   | 6456                | 4069                  |
| Age                             |                       |                       |                     |                       |
| <40                             | 0.03 (0.01 - 0.09)    | 0.03 (0.01 - 0.12)    | 0.16 (0.09 - 0.28)  | 0.21 (0.12 - 0.37)    |
| 40-49                           | 0.21 (0.11 - 0.38)    | 0.15 (0.05 - 0.45)    | 0.27 (0.21 - 0.35)  | 0.21 (0.14 - 0.31)    |
| 50-59                           | 0.42 (0.28 - 0.65)    | 0.78 (0.43 - 1.4)     | 0.50 (0.44 - 0.57)  | 0.57 (0.48 - 0.69)    |
| 60-69                           | 1.00                  | 1.00                  | 1.00                | 1.00                  |
| 70-79                           | 1.93 (1.37 - 2.72)    | 1.93 (1.14 - 3.28)    | 1.95 (1.79 - 2.12)  | 1.94 (1.72 - 2.19)    |
| ≥80                             | 4.00 (2.82 - 5.69)    | 6.56 (4.04 - 10.66)   | 4.63 (4.27 - 5.03)  | 4.36 (3.88 - 4.90)    |
| Deprivation                     |                       |                       |                     |                       |
| Most deprived                   | 2.03 (1.29 - 3.19)    | 1.83 (1.07 - 3.13)    | 1.54 (1.41 - 1.68)  | 1.34 (1.20 - 1.49)    |
| 2nd most deprived               | 1.77 (1.13 - 2.78)    | 1.34 (0.77 - 2.32)    | 1.36 (1.25 - 1.48)  | 1.16 (1.04 - 1.29)    |
| 3rd most deprived               | 2.03 (1.30 - 3.15)    | 1.57 (0.92 - 2.68)    | 1.12 (1.03 - 1.22)  | 1.01 (0.91 - 1.13)    |
| 2nd Least deprived              | 1.21 (0.74 - 1.97)    | 1.21 (0.69 - 2.14)    | 1.03 (0.94 - 1.12)  | 0.98 (0.88 - 1.1)     |
| Least deprived                  | 1.00                  | 1.00                  | 1.00                | 1.00                  |
| Region                          |                       |                       |                     |                       |
| London                          | 2.66 (1.62 - 4.38)    | 1.95 (1.08 - 3.51)    | 1.64 (1.5 - 1.80)   | 1.5 (1.8 - 1.77)      |
| South West                      | 0.90 (0.47 - 1.74)    | 0.91 (0.45 - 1.85)    | 0.62 (0.55 - 0.70)  | 0.6 (0.51 - 0.70)     |
| South East                      | 1.00                  | 1.00                  | 1.00                | 1.00                  |
| Midlands                        | 1.74 (1.07 - 2.80)    | 1.16 (0.66 - 2.03)    | 0.99 (0.9 - 1.08)   | 1.12 (0.99 - 1.25)    |
| East of England                 | 2.23 (1.32 - 3.76)    | 1.56 (0.84 - 2.87)    | 0.93 (0.84 - 1.04)  | 1.02 (0.89 - 1.16)    |
| North West                      | 1.82 (1.05 - 3.16)    | 1.47 (0.78 - 2.77)    | 1.12 (1.01 - 1.23)  | 1.25 (1.10 - 1.41)    |
| North East                      | 1.22 (0.70 - 2.11)    | 1.09 (0.59 - 2.02)    | 0.88 (0.8 - 0.97)   | 1.09 (0.96 - 1.23)    |
| Ethnic group                    |                       |                       |                     |                       |
| Asian                           | 1.80 (1.24 - 2.6)     | 1.34 (0.79 - 2.28)    | 1.12 (1.03 - 1.22)  | 1.04 (0.93 - 1.15)    |
| Black                           | 2.10 (1.37 - 3.23)    | 1.39 (0.78 - 2.50)    | 1.88 (1.71 - 2.08)  | 1.32 (1.16 - 1.51)    |
| Mixed                           | 0.78 (0.19 - 3.16)    | 1.01 (0.25 - 4.14)    | 1.47 (1.19 - 1.83)  | 1.09 (0.81 - 1.46)    |
| Other                           | 2.66 (1.35 - 5.24)    | 0.89 (0.22 - 3.62)    | 1.13 (0.94 - 1.37)  | 0.81 (0.62 - 1.08)    |
| White                           | 1.00                  | 1.00                  | 1.00                | 1.00                  |
| Missing                         | 1.32 (0.82 - 2.14)    | 0.9 (0.45 - 1.78)     | 0.85 (0.78 - 0.93)  | 0.73 (0.65 - 0.82)    |
| HbA1c                           |                       |                       |                     |                       |
| <48 mmol/mol                    | 1.26 (0.73 - 2.15)    | 1.5 (0.75 - 3.02)     | 1.08 (1.00 - 1.17)  | 1.16 (1.06 - 1.28)    |
| 48-53 mmol/mol                  | 1.00                  | 1.00                  | 1.00                | 1.00                  |
| 54-58 mmol/mol                  | 0.71 (0.39 - 1.29)    | 0.91 (0.42 - 2.01)    | 1.08 (0.98 - 1.18)  | 0.98 (0.87 - 1.12)    |
| 59-74 mmol/mol                  | 1.17 (0.75 - 1.84)    | 1.12 (0.6 - 2.07)     | 1.16 (1.06 - 1.25)  | 1.34 (1.20 - 1.49)    |
| 75-85 mmol/mol                  | 1.28 (0.75 - 2.16)    | 1.49 (0.75 - 2.96)    | 1.27 (1.12 - 1.43)  | 1.52 (1.31 - 1.77)    |
| ≥86 mmol/mol                    | 1.99 (1.20 - 3.29)    | 2.50 (1.31 - 4.78)    | 1.49 (1.32 - 1.67)  | 1.81 (1.57 - 2.09)    |
| Missing                         | 1.64 (0.94 - 2.88)    | 1.24 (0.58 - 2.67)    | 1.23 (1.10 - 1.38)  | 1.16 (1.01 - 1.33)    |
| Duration of diagnosis           |                       |                       |                     |                       |
| <1 year                         | 10.26 (0.92 - 114.08) | -                     | 1.02 (0.72 - 1.46)  | 0.99 (0.63 - 1.55)    |
| 1-2 years                       | 1.02 (0.14 - 7.27)    | 2.26 (0.41 - 12.37)   | 0.92 (0.81 - 1.04)  | 0.83 (0.71 - 0.98)    |
| 3-4 years                       | 1.00                  | 1.00                  | 1.00                | 1.00                  |
| 5-9 years                       | 1.64 (0.36 - 7.47)    | 1.65 (0.35 - 7.78)    | 0.96 (0.87 - 1.06)  | 1.06 (0.93 - 1.20)    |
| 10-14 years                     | 2.56 (0.61 - 10.78)   | 1.82 (0.42 - 7.95)    | 1.06 (0.96 - 1.18)  | 1.01 (0.89 - 1.15)    |
| 15-19 years                     | 3.46 (0.84 - 14.23)   | 2.17 (0.52 - 9.08)    | 1.20 (1.08 - 1.33)  | 1.19 (1.05 - 1.35)    |
| ≥20 years                       | 2.52 (0.62 - 10.25)   | 1.68 (0.41 - 6.88)    | 1.28 (1.15 - 1.42)  | 1.25 (1.09 - 1.43)    |
| eGFR                            |                       |                       |                     |                       |
| ≥90 ml/min/1.73m <sup>2.2</sup> | 1.00                  | 1.00                  | 1.00                | 1.00                  |
| 60-89 ml/min/1.73m <sup>2</sup> | 1.24 (0.86 - 1.77)    | 1.06 (0.63 - 1.78)    | 1.02 (0.96 - 1.10)  | 1.01 (0.92 - 1.12)    |
| 45-59 ml/min/1.73m <sup>2</sup> | 2.22 (1.46 - 3.38)    | 1.85 (1.05 - 3.24)    | 1.34 (1.23 - 1.45)  | 1.48 (1.32 - 1.65)    |
| 30-44 ml/min/1.73m <sup>2</sup> | 2.44 (1.54 - 3.87)    | 2.36 (1.32 - 4.22)    | 1.73 (1.58 - 1.90)  | 1.80 (1.6 - 2.03)     |
| 15-29 ml/min/1.73m <sup>2</sup> | 3.93 (2.35 - 6.59)    | 3.55 (1.81 - 6.98)    | 2.12 (1.87 - 2.40)  | 2.57 (2.22 - 2.99)    |
| <15 ml/min/1.73m <sup>2</sup>   | 8.07 (4.79 - 13.58)   | 8.73 (4.29 - 17.77)   | 4.49 (3.84 - 5.25)  | 5.67 (4.63 - 6.95)    |
| Missing                         | 1.38 (0.67 - 2.83)    | 2.44 (1.04 - 5.75)    | 0.78 (0.63 - 0.95)  | 0.92 (0.73 - 1.16)    |
| Body mass index                 |                       |                       |                     |                       |
| <20 kg/m <sup>2</sup>           | 2.15 (1.15 - 4.01)    | 2.6 (1.41 - 4.81)     | 2.08 (1.8 - 2.41)   | 2.59 (2.26 - 2.97)    |
| 20-24.9 kg/m <sup>2</sup>       | 1.35 (0.96 - 1.89)    | 1.74 (1.1 - 2.76)     | 1.28 (1.2 - 1.38)   | 1.45 (1.31 - 1.59)    |
| 25-29.9 kg/m <sup>2</sup>       | 1.00                  | 1.00                  | 1.00                | 1.00                  |
| 30-34.9 kg/m <sup>2</sup>       | 1.37 (0.97 - 1.92)    | 1.68 (1.05 - 2.71)    | 1.03 (0.96 - 1.11)  | 1.06 (0.97 - 1.17)    |
| 35-39.9 kg/m <sup>2</sup>       | 2.46 (1.64 - 3.70)    | 0.82 (0.39 - 1.74)    | 1.18 (1.07 - 1.29)  | 1.19 (1.06 - 1.34)    |
| ≥40 kg/m <sup>2</sup>           | 2.15 (1.15 - 4.00)    | 2.55 (1.40 - 4.67)    | 1.63 (1.45 - 1.84)  | 1.61 (1.42 - 1.83)    |
| Missing                         | 1.91 (1.21 - 3.04)    | 2.15 (1.21 - 3.81)    | 1.77 (1.61 - 1.94)  | 2.09 (1.87 - 2.33)    |

|                            |                    |                    |                    |                    |
|----------------------------|--------------------|--------------------|--------------------|--------------------|
| Systolic blood pressure    |                    |                    |                    |                    |
| ≤140 mmHg                  | 1.00               | 1.00               | 1.00               | 1.00               |
| >140 mmHg                  | 0.98 (0.75 - 1.28) | 0.67 (0.47 - 0.95) | 0.86 (0.81 - 0.91) | 0.87 (0.81 - 0.94) |
| Missing                    | 0.62 (0.37 - 1.05) | 0.85 (0.46 - 1.57) | 0.68 (0.60 - 0.76) | 0.79 (0.69 - 0.90) |
| On anti-hypertensive drugs |                    |                    |                    |                    |
| Yes                        | 0.87 (0.59 - 1.29) | 1.46 (0.88 - 2.41) | 1.13 (1.04 - 1.23) | 1.02 (0.92 - 1.13) |
| No                         | 1.00               | 1.00               | 1.00               | 1.00               |
| Missing                    | -                  | -                  | -                  | -                  |
| Total cholesterol          |                    |                    |                    |                    |
| <5 mmol/l                  | 1.00               | 1.00               | 1.00               | 1.00               |
| ≥5 mmol/l                  | 1.08 (0.72 - 1.62) | 1.06 (0.71 - 1.59) | 1.11 (1.02 - 1.2)  | 0.95 (0.87 - 1.04) |
| Missing                    | 1.45 (1.01 - 2.08) | 1.18 (0.74 - 1.87) | 1.64 (1.51 - 1.78) | 1.70 (1.54 - 1.87) |
| On statins                 |                    |                    |                    |                    |
| Yes                        | 0.96 (0.7 - 1.31)  | 0.66 (0.46 - 0.92) | 0.73 (0.69 - 0.78) | 0.70 (0.65 - 0.75) |
| No                         | 1.00               | 1.00               | 1.00               | 1.00               |
| Missing                    | 1.05 (0.3 - 3.72)  | 1.90 (0.51 - 7.18) | 0.67 (0.49 - 0.91) | 0.67 (0.48 - 0.96) |
| Smoking                    |                    |                    |                    |                    |
| Current smoker             | 0.87 (0.57 - 1.33) | 0.91 (0.5 - 1.67)  | 0.62 (0.56 - 0.7)  | 0.76 (0.65 - 0.88) |
| Ex-smoker                  | 1.02 (0.79 - 1.32) | 1.18 (0.84 - 1.68) | 1.09 (1.03 - 1.15) | 1.19 (1.11 - 1.28) |
| Non-smoker*                | 0.74 (0.30 - 1.8)  | 1.3 (0.60 - 2.81)  | 1.24 (1.05 - 1.46) | 1.33 (1.11 - 1.59) |
| Never smoked               | 1.00               | 1.00               | 1.00               | 1.00               |
| Missing                    | -                  | -                  | 2.02 (1.12 - 3.66) | 2.24 (1.06 - 4.71) |
| Co-morbidities             |                    |                    |                    |                    |
| Previous MI                | 0.99 (0.59 - 1.68) | 1.74 (0.98 - 3.07) | 1.10 (0.97 - 1.24) | 1.15 (0.97 - 1.36) |
| Previous stroke            | 2.29 (1.55 - 3.39) | 2.36 (1.47 - 3.8)  | 2.16 (1.97 - 2.37) | 1.82 (1.61 - 2.05) |
| Previous heart failure     | 1.97 (1.45 - 2.68) | 1.53 (1.03 - 2.27) | 1.98 (1.85 - 2.12) | 2.27 (2.09 - 2.47) |

\* This category is used where an individual is not currently a smoker but their history is unknown therefore interpretation of the results is complex.

- indicates that small number of cases in this category meant that it was not possible to calculate a HR with appropriate CI

**Table S5: Adjusted hazard ratios for COVID-19 related death in people with Type 1 and Type 2 diabetes stratified by age**

|                                 | Type 1                    |                          | Type 2                    |                          |
|---------------------------------|---------------------------|--------------------------|---------------------------|--------------------------|
|                                 | < 70 years<br>HR (95% CI) | 70+ years<br>HR (95% CI) | < 70 years<br>HR (95% CI) | 70+ years<br>HR (95% CI) |
| Deaths                          | 163                       | 301                      | 1881                      | 8644                     |
| Sex                             |                           |                          |                           |                          |
| Male                            | 1.85 (1.32 - 2.61)        | 1.49 (1.17 - 1.91)       | 1.72 (1.56 - 1.9)         | 1.59 (1.52 - 1.66)       |
| Female                          | 1.00                      | 1.00                     | 1.00                      | 1.00                     |
| Age                             |                           |                          |                           |                          |
| <40                             | 0.24 (0.14 - 0.42)        | N/A                      | 0.32 (0.26 - 0.4)         | N/A                      |
| 40-49                           | 0.59 (0.42 - 0.84)        | N/A                      | 0.59 (0.53 - 0.66)        | N/A                      |
| 50-59                           | 1.21 (0.68 - 2.17)        | N/A                      | 1.54 (1.28 - 1.85)        | N/A                      |
| 60-69                           | 1.00                      | N/A                      | 1.00                      | N/A                      |
| 70-79                           | N/A                       | 1.00                     | N/A                       | 1.00                     |
| ≥80                             | N/A                       | 2.57 (2.01 - 3.29)       | N/A                       | 2.36 (2.25 - 2.48)       |
| Deprivation                     |                           |                          |                           |                          |
| Most deprived                   | 1.21 (0.68 - 2.17)        | 2.42 (1.58 - 3.72)       | 1.54 (1.28 - 1.85)        | 1.46 (1.36 - 1.57)       |
| 2nd most deprived               | 1.26 (0.71 - 2.24)        | 1.75 (1.13 - 2.7)        | 1.42 (1.19 - 1.71)        | 1.26 (1.17 - 1.35)       |
| 3rd most deprived               | 1.25 (0.7 - 2.24)         | 2.13 (1.4 - 3.25)        | 1.25 (1.03 - 1.51)        | 1.06 (0.98 - 1.14)       |
| 2nd Least deprived              | 1.28 (0.71 - 2.33)        | 1.12 (0.7 - 1.8)         | 1.02 (0.83 - 1.25)        | 1.01 (0.94 - 1.09)       |
| Least deprived                  | 1.00                      | 1.00                     | 1.00                      | 1.00                     |
| Missing                         | -                         | -                        | 0 (0 - 9.324E+78)         | 2.08 (0.99 - 4.38)       |
| Region                          |                           |                          |                           |                          |
| London                          | 1.93 (1.09 - 3.43)        | 2.77 (1.66 - 4.61)       | 1.79 (1.51 - 2.13)        | 1.51 (2.13 - 1.65)       |
| South West                      | 0.47 (0.19 - 1.17)        | 1.26 (0.70 - 2.29)       | 0.63 (0.48 - 0.82)        | 0.61 (0.55 - 0.68)       |
| South East                      | 1.00                      | 1.00                     | 1.00                      | 1.00                     |
| Midlands                        | 1.07 (0.61 - 1.88)        | 1.83 (1.13 - 2.97)       | 1.07 (0.89 - 1.28)        | 1.03 (0.95 - 1.11)       |
| East of England                 | 1.64 (0.90 - 2.99)        | 2.13 (1.25 - 3.63)       | 1.08 (0.88 - 1.34)        | 0.94 (0.86 - 1.03)       |
| North West                      | 1.02 (0.52 - 2.01)        | 2.30 (1.34 - 3.95)       | 0.96 (0.79 - 1.18)        | 1.21 (1.11 - 1.31)       |
| North East                      | 0.84 (0.44 - 1.6)         | 1.43 (0.83 - 2.46)       | 0.76 (0.62 - 0.93)        | 1.00 (0.92 - 1.08)       |
| Missing                         | -                         | -                        | -                         | -                        |
| Ethnic group                    |                           |                          |                           |                          |
| Asian                           | 3.05 (1.92 - 4.85)        | 1.45 (0.64 - 3.31)       | 1.48 (1.3 - 1.69)         | 0.94 (0.78 - 1.13)       |
| Black                           | 2.53 (1.44 - 4.44)        | 1.1 (0.67 - 1.79)        | 2.25 (1.93 - 2.64)        | 0.79 (0.73 - 0.85)       |
| Mixed                           | 1.1 (0.27 - 4.53)         | 1.39 (0.90 - 2.15)       | 1.63 (1.18 - 2.26)        | 1.49 (1.36 - 1.63)       |
| Other                           | 2.66 (1.08 - 6.57)        | 1.67 (1.02 - 2.74)       | 1.36 (1.01 - 1.84)        | 1.10 (1.03 - 1.17)       |
| White                           | 1.00                      | 1.00                     | 1.00                      | 1.00                     |
| Missing                         | 1.29 (0.67 - 2.49)        | 0.61 (0.33 - 1.14)       | 0.91 (0.76 - 1.09)        | 1.01 (0.93 - 1.10)       |
| HbA1c                           |                           |                          |                           |                          |
| <48 mmol/mol                    | 0.66 (0.27 - 1.61)        | 1.67 (1.02 - 2.74)       | 1.14 (0.97 - 1.34)        | 1.1 (1.03 - 1.17)        |
| 48-53 mmol/mol                  | 1.00                      | 1.00                     | 1.00                      | 1.00                     |
| 54-58 mmol/mol                  | 1.05 (0.49 - 2.26)        | 0.61 (0.33 - 1.14)       | 1.26 (1.06 - 1.51)        | 1.01 (0.93 - 1.10)       |
| 59-74 mmol/mol                  | 0.8 (0.41 - 1.55)         | 1.33 (0.86 - 2.06)       | 1.31 (1.12 - 1.53)        | 1.21 (1.13 - 1.3)        |
| 75-85 mmol/mol                  | 1.34 (0.67 - 2.7)         | 1.3 (0.77 - 2.19)        | 1.52 (1.25 - 1.86)        | 1.33 (1.19 - 1.48)       |
| ≥86 mmol/mol                    | 1.80 (0.91 - 3.54)        | 2.39 (1.46 - 3.91)       | 1.98 (1.65 - 2.37)        | 1.48 (1.32 - 1.65)       |
| Missing                         | 1.60 (0.75 - 3.41)        | 1.33 (0.75 - 2.37)       | 1.18 (0.94 - 1.49)        | 1.2 (1.09 - 1.32)        |
| Duration of diagnosis           |                           |                          |                           |                          |
| <1 year                         | -                         | -                        | 1.18 (0.72 - 1.94)        | 0.97 (0.69 - 1.36)       |
| 1-2 years                       | 1.84 (0.31 - 11.05)       | 1.45 (0.24 - 8.68)       | 0.92 (0.75 - 1.11)        | 0.89 (0.79 - 1.00)       |
| 3-4 years                       | 1.00                      | 1.00                     | 1.00                      | 1.00                     |
| 5-9 years                       | 1.19 (0.25 - 5.75)        | 2.05 (0.45 - 9.28)       | 1.06 (0.90 - 1.25)        | 0.97 (0.88 - 1.06)       |
| 10-14 years                     | 1.60 (0.37 - 7.02)        | 2.63 (0.63 - 11.07)      | 1.14 (0.97 - 1.35)        | 1.00 (0.92 - 1.09)       |
| 15-19 years                     | 2.25 (0.53 - 9.47)        | 3.14 (0.77 - 12.87)      | 1.21 (1.01 - 1.45)        | 1.16 (1.06 - 1.27)       |
| ≥20 years                       | 2.12 (0.51 - 8.76)        | 2.14 (0.53 - 8.68)       | 1.37 (1.12 - 1.68)        | 1.24 (1.13 - 1.36)       |
| eGFR                            |                           |                          |                           |                          |
| ≥90 ml/min/1.73m <sup>2</sup>   | 1.00                      | 1.00                     | 1.00                      | 1.00                     |
| 60-89 ml/min/1.73m <sup>2</sup> | 1.25 (0.79 - 1.96)        | 0.94 (0.64 - 1.38)       | 1.26 (1.13 - 1.41)        | 0.90 (0.85 - 0.96)       |
| 45-59 ml/min/1.73m <sup>2</sup> | 2.68 (1.47 - 4.89)        | 1.52 (1.01 - 2.3)        | 2.16 (1.82 - 2.57)        | 1.22 (1.13 - 1.31)       |
| 30-44 ml/min/1.73m <sup>2</sup> | 5.22 (2.92 - 9.35)        | 1.57 (1.01 - 2.45)       | 3.61 (2.94 - 4.43)        | 1.53 (1.41 - 1.65)       |
| 15-29 ml/min/1.73m <sup>2</sup> | 7.01 (3.66 - 13.39)       | 2.36 (1.40 - 3.96)       | 4.99 (3.87 - 6.44)        | 1.97 (1.78 - 2.19)       |
| <15 ml/min/1.73m <sup>2</sup>   | 11.46 (6.31 - 20.81)      | 4.94 (2.65 - 9.2)        | 8.44 (6.64 - 10.73)       | 3.88 (3.36 - 4.49)       |
| Missing                         | 1.91 (0.87 - 4.19)        | 1.65 (0.76 - 3.58)       | 0.94 (0.67 - 1.33)        | 0.78 (0.65 - 0.92)       |
| Body mass index                 |                           |                          |                           |                          |
| <20 kg/m <sup>2</sup>           | 2.12 (0.91 - 4.95)        | 2.3 (1.4 - 3.78)         | 1.72 (1.1 - 2.7)          | 2.26 (2.04 - 2.5)        |
| 20-24.9 kg/m <sup>2</sup>       | 1.47 (0.87 - 2.46)        | 1.48 (1.08 - 2.03)       | 1.22 (1.03 - 1.45)        | 1.33 (1.25 - 1.41)       |

|                            |                    |                    |                    |                    |
|----------------------------|--------------------|--------------------|--------------------|--------------------|
| 25-29.9 kg/m <sup>2</sup>  | -                  | -                  | -                  | -                  |
| 30-34.9 kg/m <sup>2</sup>  | 1.96 (1.2 - 3.21)  | 1.31 (0.94 - 1.83) | 1.21 (1.06 - 1.39) | 1.02 (0.95 - 1.08) |
| 35-39.9 kg/m <sup>2</sup>  | 3.36 (1.94 - 5.84) | 1.10 (0.67 - 1.80) | 1.66 (1.43 - 1.93) | 1.05 (0.97 - 1.15) |
| ≥40 kg/m <sup>2</sup>      | 4.44 (2.44 - 8.1)  | 1.24 (0.63 - 2.41) | 2.30 (1.97 - 2.68) | 1.35 (1.21 - 1.51) |
| Missing                    | 2.42 (1.30 - 4.50) | 1.74 (1.12 - 2.71) | 1.98 (1.63 - 2.4)  | 1.86 (1.73 - 2.01) |
| Systolic blood pressure    |                    |                    |                    |                    |
| ≤140 mmHg                  | 1.00               | 1.00               | 1.00               | 1.00               |
| >140 mmHg                  | 0.88 (0.61 - 1.26) | 0.82 (0.63 - 1.07) | 0.87 (0.78 - 0.97) | 0.86 (0.82 - 0.9)  |
| Missing                    | 0.64 (0.34 - 1.18) | 0.78 (0.46 - 1.32) | 0.64 (0.52 - 0.79) | 0.77 (0.7 - 0.85)  |
| On anti-hypertensive drugs |                    |                    |                    |                    |
| Yes                        | 1.25 (0.78 - 1.99) | 0.79 (0.53 - 1.16) | 0.84 (0.75 - 0.95) | 0.92 (0.86 - 0.99) |
| No                         | 1.00               | 1.00               | 1.00               | 1.00               |
| Missing                    | -                  | -                  | -                  | -                  |
| Total cholesterol          |                    |                    |                    |                    |
| <5 mmol/l                  | 1.00               | 1.00               | 1.00               | 1.00               |
| ≥5 mmol/l                  | 1.30 (0.85 - 1.98) | 0.96 (0.66 - 1.41) | 1.08 (0.95 - 1.22) | 1.00 (0.94 - 1.08) |
| Missing                    | 1.09 (0.65 - 1.81) | 1.47 (1.04 - 2.08) | 1.47 (1.25 - 1.73) | 1.7 (1.59 - 1.82)  |
| On statins                 |                    |                    |                    |                    |
| Yes                        | 0.89 (0.6 - 1.33)  | 0.76 (0.58 - 1.01) | 0.84 (0.75 - 0.95) | 0.69 (0.66 - 0.73) |
| No                         | 1.00               | 1.00               | 1.00               | 1.00               |
| Missing                    | -                  | 1.50 (0.56 - 4.03) | -                  | 0.54 (0.42 - 0.70) |
| Smoking                    |                    |                    |                    |                    |
| Current smoker             | 1.34 (0.86 - 2.09) | 0.53 (0.28 - 1.02) | 0.48 (0.40 - 0.58) | 0.80 (0.72 - 0.88) |
| Ex-smoker                  | 1.07 (0.74 - 1.56) | 1.09 (0.85 - 1.40) | 1.17 (1.05 - 1.29) | 1.13 (1.07 - 1.18) |
| Non-smoker*                | 1.93 (0.89 - 4.21) | 0.60 (0.25 - 1.46) | 1.07 (0.78 - 1.47) | 1.32 (1.16 - 1.51) |
| Never smoked               | 1.00               | 1.00               | 1.00               | 1.00               |
| Missing                    | -                  | -                  | 1.98 (0.74 - 5.31) | 2.17 (1.28 - 3.68) |
| Co-morbidities             |                    |                    |                    |                    |
| Previous MI                | 0.68 (0.29 - 1.60) | 1.60 (1.04 - 2.47) | 1.23 (0.97 - 1.56) | 1.07 (0.96 - 1.20) |
| Previous stroke            | 2.53 (1.47 - 4.38) | 2.21 (1.54 - 3.17) | 2.17 (1.74 - 2.7)  | 1.98 (1.83 - 2.14) |
| Previous heart failure     | 2.29 (1.45 - 3.61) | 1.7 (1.27 - 2.26)  | 2.44 (2.08 - 2.85) | 2.08 (1.97 - 2.20) |

\* This category is used where an individual is not currently a smoker but their history is unknown therefore interpretation of the results is complex.

- indicates that small number of cases in this category meant that it was not possible to calculate a HR with appropriate CI

Table S6: Adjusted hazard ratios for COVID-19 related death in people with Type 2 diabetes stratified by ethnicity

|                       | White<br>HR (95% CI) | Mixed<br>HR (95% CI)  | Asian<br>HR (95% CI) | Black<br>HR (95% CI) | Other<br>HR (95% CI)  | Missing<br>HR (95% CI) |
|-----------------------|----------------------|-----------------------|----------------------|----------------------|-----------------------|------------------------|
| Number of deaths      | 7105                 | 133                   | 1313                 | 884                  | 164                   | 926                    |
| Sex                   |                      |                       |                      |                      |                       |                        |
| Male                  | 1.50 (1.42 - 1.57)   | 2.15 (1.45 - 3.16)    | 1.78 (1.58 - 2.01)   | 2.41 (2.08 - 2.81)   | 2.26 (1.58 - 3.22)    | 1.89 (1.63 - 2.18)     |
| Female                | 1.00                 | 1.00                  | 1.00                 | 1.00                 | 1.00                  | 1.00                   |
| Age                   |                      |                       |                      |                      |                       |                        |
| <40                   | 0.07 (0.03 - 0.19)   | -                     | 0.32 (0.19 - 0.56)   | 0.13 (0.03 - 0.52)   | -                     | 0.27 (0.08 - 0.85)     |
| 40-49                 | 0.30 (0.22 - 0.40)   | 0.19 (0.04 - 0.83)    | 0.18 (0.12 - 0.27)   | 0.26 (0.15 - 0.45)   | 0.22 (0.05 - 0.94)    | 0.29 (0.14 - 0.59)     |
| 50-59                 | 0.47 (0.40 - 0.55)   | 0.67 (0.34 - 1.30)    | 0.53 (0.42 - 0.65)   | 0.62 (0.48 - 0.8)    | 0.62 (0.32 - 1.18)    | 0.46 (0.31 - 0.69)     |
| 60-69                 | 1.00                 | 1.00                  | 1.00                 | 1.00                 | 1.00                  | 1.00                   |
| 70-79                 | 2.08 (1.90 - 2.28)   | 2.46 (1.44 - 4.20)    | 1.84 (1.57 - 2.15)   | 1.70 (1.36 - 2.11)   | 1.77 (1.12 - 2.82)    | 2.24 (1.76 - 2.87)     |
| ≥80                   | 5.06 (4.63 - 5.53)   | 3.51 (2.03 - 6.08)    | 3.36 (2.87 - 3.94)   | 3.39 (2.77 - 4.14)   | 3.43 (2.12 - 5.55)    | 6.10 (4.8 - 7.75)      |
| Deprivation           |                      |                       |                      |                      |                       |                        |
| Most deprived         | 1.40 (1.30 - 1.52)   | 1.49 (0.71 - 3.13)    | 2.17 (1.68 - 2.81)   | 1.33 (0.9 - 1.96)    | 1.96 (1.05 - 3.68)    | 1.6 (1.29 - 1.98)      |
| 2nd most deprived     | 1.22 (1.13 - 1.32)   | 1.15 (0.54 - 2.45)    | 1.92 (1.49 - 2.47)   | 1.23 (0.83 - 1.81)   | 1.59 (0.84 - 2.98)    | 1.25 (1.01 - 1.54)     |
| 3rd most deprived     | 1.03 (0.95 - 1.11)   | 1.47 (0.69 - 3.15)    | 1.48 (1.13 - 1.92)   | 1.08 (0.72 - 1.62)   | 1.27 (0.65 - 2.50)    | 1.21 (0.99 - 1.47)     |
| 2nd Least deprived    | 1.00 (0.92 - 1.08)   | 1.36 (0.60 - 3.08)    | 1.10 (0.82 - 1.47)   | 0.93 (0.59 - 1.47)   | 1.65 (0.85 - 3.22)    | 1.05 (0.86 - 1.29)     |
| Least deprived        | 1.00                 | 1.00                  | 1.00                 | 1.00                 | 1.00                  | 1.00                   |
| Missing               | 1.50 (0.62 - 3.63)   | 44.66 (5.14 - 388.01) | 0 (0 - 1.36E+86)     | 0 (0 - 2.48E+105)    | 23.63 (2.88 - 193.69) | 0 (0 - 1.1E+126)       |
| Region                |                      |                       |                      |                      |                       |                        |
| London                | 1.74 (1.59 - 1.91)   | 1.73 (0.88 - 3.42)    | 1.39 (1.11 - 1.73)   | 1.48 (1.03 - 2.14)   | 1.55 (0.91 - 2.63)    | 1.81 (1.39 - 2.36)     |
| South West            | 0.62 (0.55 - 0.69)   | 1.02 (0.32 - 3.28)    | 0.5 (0.26 - 0.97)    | 0.79 (0.43 - 1.45)   | 0.29 (0.07 - 1.26)    | 0.66 (0.53 - 0.82)     |
| South East            | 1.00                 | 1.00                  | 1.00                 | 1.00                 | 1.00                  | 1.00                   |
| Midlands              | 1.02 (0.94 - 1.11)   | 2.35 (1.13 - 4.91)    | 0.82 (0.64 - 1.06)   | 1.10 (0.74 - 1.64)   | 0.94 (0.46 - 1.94)    | 1.16 (0.96 - 1.41)     |
| East of England       | 0.96 (0.87 - 1.05)   | 1.08 (0.43 - 2.76)    | 1.12 (0.82 - 1.53)   | 1.05 (0.65 - 1.67)   | 1.15 (0.63 - 2.1)     | 0.86 (0.66 - 1.10)     |
| North West            | 1.20 (1.10 - 1.31)   | 0.91 (0.32 - 2.56)    | 0.72 (0.53 - 0.96)   | 1.25 (0.78 - 2.01)   | 0.64 (0.26 - 1.55)    | 1.29 (1.03 - 1.61)     |
| North East            | 1.03 (0.95 - 1.12)   | 0.90 (0.32 - 2.53)    | 0.51 (0.37 - 0.69)   | 0.56 (0.32 - 1.00)   | 0.63 (0.32 - 1.24)    | 0.92 (0.72 - 1.17)     |
| Missing               | -                    | -                     | -                    | -                    | -                     | -                      |
| HbA1c                 |                      |                       |                      |                      |                       |                        |
| <48 mmol/mol          | 1.15 (1.07 - 1.23)   | 1.29 (0.71 - 2.35)    | 1.08 (0.91 - 1.28)   | 0.91 (0.73 - 1.12)   | 1.12 (0.68 - 1.85)    | 1.03 (0.84 - 1.26)     |
| 48-53 mmol/mol        | 1.00                 | 1.00                  | 1.00                 | 1.00                 | 1.00                  | 1.00                   |
| 54-58 mmol/mol        | 1.01 (0.92 - 1.11)   | 2.46 (1.32 - 4.59)    | 1.13 (0.93 - 1.37)   | 0.98 (0.76 - 1.27)   | 1.14 (0.63 - 2.05)    | 1.07 (0.84 - 1.38)     |
| 59-74 mmol/mol        | 1.20 (1.11 - 1.30)   | 1.72 (0.92 - 3.21)    | 1.18 (0.99 - 1.41)   | 1.25 (1.01 - 1.56)   | 1.34 (0.80 - 2.25)    | 1.38 (1.11 - 1.71)     |
| 75-85 mmol/mol        | 1.31 (1.16 - 1.47)   | 2.33 (1.05 - 5.17)    | 1.26 (0.98 - 1.62)   | 1.41 (1.04 - 1.90)   | 1.41 (0.67 - 2.95)    | 1.80 (1.32 - 2.47)     |
| ≥86 mmol/mol          | 1.55 (1.38 - 1.74)   | 2.63 (1.21 - 5.73)    | 1.52 (1.19 - 1.93)   | 1.57 (1.2 - 2.05)    | 2.12 (1.09 - 4.13)    | 2.04 (1.50 - 2.78)     |
| Missing               | 1.25 (1.13 - 1.38)   | 1.62 (0.65 - 4.01)    | 1.00 (0.76 - 1.32)   | 0.95 (0.68 - 1.32)   | 2.31 (1.15 - 4.66)    | 1.2 (0.91 - 1.58)      |
| Duration of diagnosis |                      |                       |                      |                      |                       |                        |
| <1 year               | 1.03 (0.73 - 1.45)   | -                     | 1.28 (0.59 - 2.77)   | 0.52 (0.13 - 2.12)   | -                     | 1.16 (0.58 - 2.28)     |
| 1-2 years             | 0.86 (0.76 - 0.98)   | 0.57 (0.23 - 1.43)    | 0.96 (0.71 - 1.3)    | 0.82 (0.57 - 1.18)   | 0.58 (0.27 - 1.25)    | 1.08 (0.83 - 1.41)     |
| 3-4 years             | 1.00                 | 1.00                  | 1.00                 | 1.00                 | 1.00                  | 1.00                   |

|                                 |                    |                     |                    |                    |                     |                    |
|---------------------------------|--------------------|---------------------|--------------------|--------------------|---------------------|--------------------|
| 5-9 years                       | 1.01 (0.92 - 1.12) | 1.00 (0.53 - 1.87)  | 1.15 (0.91 - 1.46) | 0.88 (0.66 - 1.18) | 0.39 (0.22 - 0.71)  | 0.94 (0.74 - 1.19) |
| 10-14 years                     | 1.06 (0.97 - 1.17) | 0.68 (0.34 - 1.34)  | 1.06 (0.83 - 1.36) | 1.13 (0.85 - 1.5)  | 0.54 (0.31 - 0.94)  | 0.98 (0.77 - 1.24) |
| 15-19 years                     | 1.24 (1.13 - 1.37) | 0.83 (0.42 - 1.64)  | 1.23 (0.97 - 1.57) | 1.17 (0.88 - 1.56) | 0.53 (0.29 - 0.96)  | 1.07 (0.84 - 1.37) |
| ≥20 years                       | 1.34 (1.21 - 1.49) | 0.96 (0.49 - 1.90)  | 1.30 (1.02 - 1.67) | 1.24 (0.93 - 1.66) | 0.47 (0.25 - 0.88)  | 1.06 (0.81 - 1.39) |
| eGFR                            |                    |                     |                    |                    |                     |                    |
| ≥90 ml/min/1.73m <sup>22</sup>  | 1.00               | 1.00                | 1.00               | 1.00               | 1.00                | 1.00               |
| 60-89 ml/min/1.73m <sup>2</sup> | 0.94 (0.88 - 1.01) | 1.3 (0.75 - 2.26)   | 1.16 (0.99 - 1.35) | 1.22 (1.02 - 1.45) | 1.98 (1.25 - 3.12)  | 0.99 (0.81 - 1.19) |
| 45-59 ml/min/1.73m <sup>2</sup> | 1.25 (1.16 - 1.36) | 2.52 (1.35 - 4.72)  | 1.51 (1.23 - 1.84) | 1.93 (1.54 - 2.42) | 2.39 (1.35 - 4.24)  | 1.41 (1.13 - 1.77) |
| 30-44 ml/min/1.73m <sup>2</sup> | 1.55 (1.42 - 1.69) | 3.81 (1.91 - 7.58)  | 2.47 (2.00 - 3.06) | 2.13 (1.63 - 2.79) | 4.37 (2.41 - 7.92)  | 1.58 (1.23 - 2.04) |
| 15-29 ml/min/1.73m <sup>2</sup> | 2.05 (1.83 - 2.3)  | 5.38 (2.33 - 12.43) | 2.97 (2.27 - 3.89) | 3.13 (2.24 - 4.37) | 3.2 (1.27 - 8.1)    | 2.08 (1.47 - 2.93) |
| <15 ml/min/1.73m <sup>2</sup>   | 3.72 (3.10 - 4.47) | 8.92 (3.36 - 23.69) | 8.97 (6.99 - 11.5) | 5.87 (4.27 - 8.07) | 6.37 (2.13 - 19.07) | 4.54 (2.64 - 7.81) |
| Missing                         | 0.91 (0.75 - 1.09) | 3.12 (0.97 - 10.01) | 0.89 (0.55 - 1.45) | 0.65 (0.38 - 1.11) | 0.34 (0.04 - 2.67)  | 0.87 (0.55 - 1.37) |
| Body mass index                 |                    |                     |                    |                    |                     |                    |
| <20 kg/m <sup>2</sup>           | 2.58 (2.3 - 2.89)  | 2.26 (0.79 - 6.47)  | 1.54 (1.17 - 2.02) | 1.69 (1.1 - 2.61)  | 1.31 (0.4 - 4.29)   | 2.28 (1.56 - 3.35) |
| 20-24.9 kg/m <sup>2</sup>       | 1.46 (1.36 - 1.56) | 1.40 (0.82 - 2.37)  | 0.94 (0.81 - 1.08) | 1.21 (0.99 - 1.48) | 1.27 (0.79 - 2.07)  | 1.41 (1.15 - 1.74) |
| 25-29.9 kg/m <sup>2</sup>       | 1.00               | 1.00                | 1.00               | 1.00               | 1.00                | 1.00               |
| 30-34.9 kg/m <sup>2</sup>       | 0.99 (0.93 - 1.06) | 1.54 (0.94 - 2.52)  | 1.07 (0.91 - 1.26) | 1.28 (1.06 - 1.54) | 1.48 (0.97 - 2.25)  | 1.24 (1.01 - 1.51) |
| 35-39.9 kg/m <sup>2</sup>       | 1.09 (1 - 1.19)    | 2.26 (1.25 - 4.09)  | 1.69 (1.36 - 2.1)  | 1.41 (1.10 - 1.80) | 1.00 (0.52 - 1.90)  | 1.66 (1.29 - 2.12) |
| ≥40 kg/m <sup>2</sup>           | 1.49 (1.34 - 1.65) | 2.91 (1.43 - 5.93)  | 2.46 (1.86 - 3.25) | 2.27 (1.71 - 3.02) | 3.27 (1.85 - 5.77)  | 2.17 (1.6 - 2.94)  |
| Missing                         | 1.92 (1.76 - 2.09) | 1.52 (0.73 - 3.16)  | 1.14 (0.9 - 1.44)  | 2.06 (1.61 - 2.62) | 1.63 (0.89 - 2.97)  | 2.86 (2.33 - 3.50) |
| Systolic blood pressure         |                    |                     |                    |                    |                     |                    |
| ≤140 mmHg                       | 1.00               | 1.00                | 1.00               | 1.00               | 1.00                | 1.00               |
| >140 mmHg                       | 0.85 (0.81 - 0.90) | 1.02 (0.70 - 1.50)  | 0.88 (0.78 - 1.01) | 1.03 (0.89 - 1.19) | 0.75 (0.51 - 1.10)  | 0.76 (0.65 - 0.88) |
| Missing                         | 0.76 (0.68 - 0.84) | 0.7 (0.29 - 1.68)   | 0.68 (0.52 - 0.88) | 0.88 (0.65 - 1.20) | 0.54 (0.26 - 1.14)  | 0.62 (0.46 - 0.82) |
| On anti-hypertensive drugs      |                    |                     |                    |                    |                     |                    |
| Yes                             | 1.04 (0.96 - 1.12) | 1.77 (0.95 - 3.29)  | 1.29 (1.07 - 1.56) | 1.11 (0.88 - 1.41) | 1.02 (0.61 - 1.69)  | 1.01 (0.83 - 1.23) |
| No                              | 1.00               | 1.00                | 1.00               | 1.00               | 1.00                | 1.00               |
| Missing                         | -                  | -                   | -                  | -                  | -                   | -                  |
| Total cholesterol               |                    |                     |                    |                    |                     |                    |
| <5 mmol/l                       | 1.00               | 1.00                | 1.00               | 1.00               | 1.00                | 1.00               |
| ≥5 mmol/l                       | 0.98 (0.91 - 1.06) | 0.77 (0.47 - 1.27)  | 1.21 (1.02 - 1.43) | 1.12 (0.92 - 1.35) | 1.10 (0.68 - 1.79)  | 1.08 (0.89 - 1.31) |
| Missing                         | 1.74 (1.62 - 1.87) | 0.73 (0.36 - 1.47)  | 1.55 (1.27 - 1.89) | 1.39 (1.09 - 1.77) | 1.06 (0.59 - 1.88)  | 1.6 (1.31 - 1.96)  |
| On statins                      |                    |                     |                    |                    |                     |                    |
| Yes                             | 0.70 (0.67 - 0.74) | 0.49 (0.33 - 0.71)  | 0.71 (0.61 - 0.82) | 0.89 (0.76 - 1.04) | 1.41 (0.89 - 2.24)  | 0.71 (0.61 - 0.82) |
| No                              | 1.00               | 1.00                | 1.00               | 1.00               | 1.00                | 1.00               |
| Missing                         | 0.72 (0.55 - 0.96) | 0.94 (0.11 - 7.89)  | 0.40 (0.16 - 1.01) | 0.50 (0.21 - 1.18) | 1.56 (0.31 - 7.90)  | 0.81 (0.40 - 1.65) |
| Smoking                         |                    |                     |                    |                    |                     |                    |
| Current smoker                  | 0.71 (0.64 - 0.79) | 0.77 (0.36 - 1.62)  | 0.48 (0.35 - 0.65) | 0.55 (0.39 - 0.78) | 0.05 (0.01 - 0.33)  | 0.92 (0.7 - 1.21)  |
| Ex-smoker                       | 1.15 (1.09 - 1.21) | 1.37 (0.93 - 2.02)  | 1.14 (0.99 - 1.32) | 1.08 (0.92 - 1.27) | 0.94 (0.68 - 1.32)  | 1.09 (0.94 - 1.25) |
| Non-smoker*                     | 1.34 (1.16 - 1.54) | 0.42 (0.06 - 3.02)  | 0.93 (0.61 - 1.42) | 1.30 (0.88 - 1.91) | 1.13 (0.41 - 3.08)  | 1.45 (0.97 - 2.16) |
| Never smoked                    | 1.00               | 1.00                | 1.00               | 1.00               | 1.00                | 1.00               |
| Missing                         | 2.11 (1.13 - 3.93) | -                   | 1.38 (0.19 - 9.81) | 1.61 (0.4 - 6.46)  | -                   | 3.23 (1.31 - 7.97) |
| Co-morbidities                  |                    |                     |                    |                    |                     |                    |
| Previous MI                     | 1.15 (1.02 - 1.29) | 0.37 (0.05 - 2.7)   | 1.32 (1.04 - 1.68) | 0.88 (0.55 - 1.42) | 1.26 (0.57 - 2.8)   | 0.75 (0.49 - 1.15) |

|                        |                    |                    |                   |                    |                    |                    |
|------------------------|--------------------|--------------------|-------------------|--------------------|--------------------|--------------------|
| Previous stroke        | 1.95 (1.79 - 2.13) | 0.92 (0.33 - 2.54) | 2.4 (1.94 - 2.97) | 1.92 (1.47 - 2.5)  | 2.65 (1.44 - 4.86) | 2.12 (1.65 - 2.71) |
| Previous heart failure | 2.22 (2.09 - 2.36) | 0.83 (0.43 - 1.6)  | 1.54 (1.3 - 1.81) | 1.85 (1.51 - 2.26) | 1.36 (0.84 - 2.2)  | 2.22 (1.85 - 2.67) |

\* This category is used where an individual is not currently a smoker but their history is unknown therefore interpretation of the results is complex.

- indicates that small number of cases in this category meant that it was not possible to calculate a HR with appropriate CI



Table S7: Adjusted hazard ratios for COVID-19 related death in people with Type 2 diabetes stratified by quintile of social deprivation

|                       | Most deprived<br>HR (95% CI) | 2nd most deprived<br>HR (95% CI) | 3rd most deprived<br>HR (95% CI) | 2nd least deprived<br>HR (95% CI) | Least deprived<br>HR (95% CI) |
|-----------------------|------------------------------|----------------------------------|----------------------------------|-----------------------------------|-------------------------------|
| Number of deaths      | 2817                         | 2558                             | 1983                             | 1692                              | 1468                          |
| Sex                   |                              |                                  |                                  |                                   |                               |
| Male                  | 1.64 (1.52 - 1.78)           | 1.7 (1.56 - 1.85)                | 1.61 (1.46 - 1.77)               | 1.54 (1.39 - 1.71)                | 1.48 (1.32 - 1.66)            |
| Female                | 1.00                         | 1.00                             | 1.00                             | 1.00                              | 1.00                          |
| Age                   |                              |                                  |                                  |                                   |                               |
| <40                   | 0.24 (0.13 - 0.42)           | 0.18 (0.08 - 0.38)               | 0.08 (0.02 - 0.34)               | 0.1 (0.01 - 0.68)                 | 0.30 (0.07 - 1.20)            |
| 40-49                 | 0.26 (0.19 - 0.37)           | 0.23 (0.16 - 0.34)               | 0.25 (0.16 - 0.41)               | 0.32 (0.18 - 0.6)                 | 0.16 (0.06 - 0.44)            |
| 50-59                 | 0.54 (0.45 - 0.65)           | 0.51 (0.42 - 0.62)               | 0.48 (0.37 - 0.62)               | 0.54 (0.40 - 0.75)                | 0.56 (0.39 - 0.81)            |
| 60-69                 | 1.00                         | 1.00                             | 1.00                             | 1.00                              | 1.00                          |
| 70-79                 | 2.07 (1.83 - 2.34)           | 1.76 (1.54 - 2)                  | 1.81 (1.55 - 2.12)               | 2.18 (1.80 - 2.63)                | 2.19 (1.76 - 2.72)            |
| ≥80                   | 4.37 (3.86 - 4.94)           | 4.11 (3.62 - 4.67)               | 4.08 (3.5 - 4.76)                | 5.46 (4.52 - 6.58)                | 5.83 (4.71 - 7.20)            |
| Region                |                              |                                  |                                  |                                   |                               |
| London                | 1.87 (1.53 - 2.28)           | 1.96 (1.67 - 2.30)               | 2.15 (1.83 - 2.52)               | 1.47 (1.24 - 1.73)                | 1.33 (1.11 - 1.60)            |
| South West            | 0.60 (0.45 - 0.81)           | 0.65 (0.53 - 0.82)               | 0.59 (0.47 - 0.73)               | 0.58 (0.47 - 0.71)                | 0.72 (0.59 - 0.88)            |
| South East            | 1.00                         | 1.00                             | 1.00                             | 1.00                              | 1.00                          |
| Midlands              | 1.32 (1.10 - 1.60)           | 1.18 (1.00 - 1.39)               | 1.14 (0.97 - 1.34)               | 0.86 (0.73 - 1.00)                | 0.83 (0.7 - 0.97)             |
| East of England       | 0.96 (0.75 - 1.23)           | 1.16 (0.96 - 1.41)               | 0.96 (0.80 - 1.15)               | 0.83 (0.69 - 0.99)                | 1.05 (0.89 - 1.24)            |
| North West            | 1.37 (1.13 - 1.66)           | 1.50 (1.26 - 1.78)               | 1.25 (1.03 - 1.52)               | 0.96 (0.80 - 1.14)                | 0.96 (0.79 - 1.15)            |
| North East            | 1.17 (0.96 - 1.41)           | 1.08 (0.9 - 1.29)                | 1.24 (1.04 - 1.48)               | 0.81 (0.68 - 0.96)                | 0.64 (0.52 - 0.78)            |
| Missing               |                              |                                  |                                  |                                   |                               |
| Ethnic group          |                              |                                  |                                  |                                   |                               |
| Asian                 | 1.04 (0.93 - 1.17)           | 1.24 (1.09 - 1.40)               | 1.04 (0.89 - 1.22)               | 0.84 (0.69 - 1.03)                | 0.84 (0.65 - 1.08)            |
| Black                 | 1.62 (1.42 - 1.84)           | 1.69 (1.47 - 1.95)               | 1.56 (1.28 - 1.89)               | 1.59 (1.20 - 2.12)                | 1.74 (1.20 - 2.53)            |
| Mixed                 | 1.33 (0.98 - 1.80)           | 1.07 (0.76 - 1.51)               | 1.51 (1.04 - 2.20)               | 1.50 (0.92 - 2.43)                | 1.24 (0.64 - 2.4)             |
| Other                 | 1.03 (0.78 - 1.36)           | 1.03 (0.77 - 1.39)               | 0.89 (0.6 - 1.32)                | 1.22 (0.83 - 1.79)                | 0.8 (0.46 - 1.38)             |
| White                 | 1.00                         | 1.00                             | 1.00                             | 1.00                              | 1.00                          |
| Missing               | 0.88 (0.75 - 1.03)           | 0.8 (0.68 - 0.93)                | 0.91 (0.78 - 1.05)               | 0.76 (0.65 - 0.89)                | 0.71 (0.61 - 0.83)            |
| HbA1c                 |                              |                                  |                                  |                                   |                               |
| <48 mmol/mol          | 1.05 (0.93 - 1.18)           | 1.12 (0.99 - 1.27)               | 1.16 (1.01 - 1.33)               | 1.07 (0.93 - 1.24)                | 1.19 (1.02 - 1.39)            |
| 48-53 mmol/mol        | 1.00                         | 1.00                             | 1.00                             | 1.00                              | 1.00                          |
| 54-58 mmol/mol        | 1.09 (0.94 - 1.25)           | 1.05 (0.9 - 1.22)                | 1.11 (0.94 - 1.31)               | 0.98 (0.81 - 1.18)                | 0.97 (0.80 - 1.19)            |
| 59-74 mmol/mol        | 1.17 (1.03 - 1.33)           | 1.30 (1.14 - 1.48)               | 1.23 (1.06 - 1.43)               | 1.19 (1.02 - 1.40)                | 1.20 (1.01 - 1.43)            |
| 75-85 mmol/mol        | 1.34 (1.13 - 1.60)           | 1.51 (1.25 - 1.82)               | 1.24 (0.99 - 1.56)               | 1.42 (1.12 - 1.80)                | 1.20 (0.91 - 1.59)            |
| ≥86 mmol/mol          | 1.47 (1.24 - 1.74)           | 1.60 (1.33 - 1.92)               | 1.71 (1.39 - 2.10)               | 1.67 (1.32 - 2.10)                | 1.81 (1.39 - 2.35)            |
| Missing               | 1.20 (1.01 - 1.42)           | 1.30 (1.09 - 1.55)               | 1.12 (0.92 - 1.37)               | 1.14 (0.93 - 1.40)                | 1.28 (1.02 - 1.61)            |
| Duration of diagnosis |                              |                                  |                                  |                                   |                               |
| <1 year               | 0.91 (0.76 - 1.10)           | 0.75 (0.61 - 0.92)               | 0.99 (0.79 - 1.25)               | 0.96 (0.75 - 1.23)                | 0.89 (0.69 - 1.16)            |
| 1-2 years             | 0.91 (0.78 - 1.05)           | 0.95 (0.82 - 1.11)               | 1.17 (0.97 - 1.41)               | 1.02 (0.83 - 1.25)                | 1.02 (0.83 - 1.27)            |
| 3-4 years             | 1.00                         | 1.00                             | 1.00                             | 1.00                              | 1.00                          |

|                                 |                    |                    |                     |                    |                    |
|---------------------------------|--------------------|--------------------|---------------------|--------------------|--------------------|
| 5-9 years                       | 0.91 (0.78 - 1.06) | 0.98 (0.84 - 1.14) | 1.15 (0.95 - 1.38)  | 1.20 (0.98 - 1.46) | 1.14 (0.92 - 1.40) |
| 10-14 years                     | 1.22 (1.05 - 1.41) | 1.03 (0.88 - 1.20) | 1.36 (1.12 - 1.64)  | 1.26 (1.03 - 1.55) | 1.18 (0.95 - 1.47) |
| 15-19 years                     | 1.15 (0.98 - 1.35) | 1.15 (0.97 - 1.35) | 1.46 (1.20 - 1.78)  | 1.33 (1.07 - 1.64) | 1.42 (1.13 - 1.77) |
| ≥20 years                       | 1.13 (1.02 - 1.26) | 1.04 (0.93 - 1.17) | 0.96 (0.84 - 1.09)  | 0.94 (0.82 - 1.09) | 0.95 (0.81 - 1.10) |
| eGFR                            |                    |                    |                     |                    |                    |
| ≥90 ml/min/1.73m <sup>22</sup>  | 1.00               | 1.00               | 1.00                | 1.00               | 1.00               |
| 60-89 ml/min/1.73m <sup>2</sup> | 1.13 (1.02 - 1.26) | 1.04 (0.93 - 1.17) | 0.96 (0.84 - 1.09)  | 0.94 (0.82 - 1.09) | 0.95 (0.81 - 1.10) |
| 45-59 ml/min/1.73m <sup>2</sup> | 1.51 (1.32 - 1.71) | 1.45 (1.27 - 1.66) | 1.36 (1.17 - 1.59)  | 1.37 (1.16 - 1.62) | 1.14 (0.95 - 1.36) |
| 30-44 ml/min/1.73m <sup>2</sup> | 1.82 (1.58 - 2.10) | 1.86 (1.60 - 2.15) | 1.70 (1.44 - 2.01)  | 1.65 (1.38 - 1.98) | 1.65 (1.37 - 2.00) |
| 15-29 ml/min/1.73m <sup>2</sup> | 2.43 (2.02 - 2.92) | 2.18 (1.79 - 2.66) | 2.57 (2.08 - 3.18)  | 2.23 (1.77 - 2.83) | 2.02 (1.56 - 2.61) |
| <15 ml/min/1.73m <sup>2</sup>   | 5.27 (4.22 - 6.57) | 5.07 (3.98 - 6.46) | 4.71 (3.5 - 6.35)   | 5.67 (4.12 - 7.8)  | 3.58 (2.40 - 5.34) |
| Missing                         | 0.87 (0.65 - 1.16) | 0.78 (0.57 - 1.07) | 0.70 (0.48 - 1.02)  | 0.92 (0.64 - 1.33) | 0.94 (0.63 - 1.40) |
| Body mass index                 |                    |                    |                     |                    |                    |
| <20 kg/m <sup>2</sup>           | 1.30 (1.16 - 1.45) | 1.35 (1.20 - 1.51) | 1.27 (1.12 - 1.45)  | 1.27 (1.12 - 1.45) | 1.38 (1.2 - 1.60)  |
| 20-24.9 kg/m <sup>2</sup>       | 0.91 (0.82 - 1.02) | 1.08 (0.96 - 1.21) | 1.04 (0.91 - 1.18)  | 1.04 (0.91 - 1.18) | 1.14 (0.98 - 1.33) |
| 25-29.9 kg/m <sup>2</sup>       | 1.00               | 1.00               | 1.00                | 1.00               | 1.00               |
| 30-34.9 kg/m <sup>2</sup>       | 1.03 (0.9 - 1.18)  | 1.26 (1.09 - 1.45) | 1.20 (1.01 - 1.42)  | 1.15 (0.95 - 1.40) | 1.26 (1.02 - 1.55) |
| 35-39.9 kg/m <sup>2</sup>       | 1.34 (1.14 - 1.56) | 1.53 (1.29 - 1.83) | 1.62 (1.32 - 1.98)  | 2.09 (1.68 - 2.60) | 1.98 (1.54 - 2.55) |
| ≥40 kg/m <sup>2</sup>           | 1.76 (1.53 - 2.03) | 1.86 (1.61 - 2.15) | 2.03 (1.74 - 2.38)  | 2.29 (1.94 - 2.70) | 1.61 (1.33 - 1.96) |
| Missing                         | 0.89 (0.81 - 0.97) | 0.89 (0.81 - 0.97) | 0.86 (0.77 - 0.95)  | 0.87 (0.78 - 0.98) | 0.78 (0.69 - 0.89) |
| Systolic blood pressure         |                    |                    |                     |                    |                    |
| ≤140 mmHg                       | 1.00               | 1.00               | 1.00                | 1.00               | 1.00               |
| >140 mmHg                       | 0.77 (0.65 - 0.90) | 0.63 (0.53 - 0.76) | 0.68 (0.55 - 0.84)  | 0.75 (0.61 - 0.93) | 0.82 (0.66 - 1.03) |
| Missing                         | 1.05 (0.94 - 1.18) | 1.05 (0.93 - 1.18) | 0.99 (0.86 - 1.13)  | 1.04 (0.89 - 1.22) | 0.98 (0.83 - 1.15) |
| On anti-hypertensive drugs      |                    |                    |                     |                    |                    |
| Yes                             | 1.11 (0.97 - 1.26) | 1.14 (0.99 - 1.30) | 1 (0.86 - 1.15)     | 1.01 (0.86 - 1.19) | 1.15 (0.97 - 1.37) |
| No                              | 1.00               | 1.00               | 1.00                | 1.00               | 1.00               |
| Missing                         | -                  | -                  | -                   | -                  | -                  |
| Total cholesterol               |                    |                    |                     |                    |                    |
| <5 mmol/l                       | 1.00               | 1.00               | 1.00                | 1.00               | 1.00               |
| ≥5 mmol/l                       | 1.57 (1.39 - 1.77) | 1.61 (1.42 - 1.83) | 1.61 (1.40 - 1.85)  | 1.90 (1.64 - 2.19) | 1.77 (1.51 - 2.07) |
| Missing                         | 0.55 (0.47 - 0.64) | 0.69 (0.58 - 0.82) | 0.79 (0.64 - 0.97)  | 0.74 (0.58 - 0.95) | 0.81 (0.61 - 1.08) |
| On statins                      |                    |                    |                     |                    |                    |
| Yes                             | 0.75 (0.69 - 0.82) | 0.74 (0.67 - 0.81) | 0.63 (0.57 - 0.7)   | 0.81 (0.73 - 0.91) | 0.65 (0.57 - 0.73) |
| No                              | 1.00               | 1.00               | 1.00                | 1.00               | 1.00               |
| Missing                         | 0.52 (0.31 - 0.86) | 0.45 (0.25 - 0.82) | 0.7 (0.41 - 1.2)    | 0.65 (0.37 - 1.14) | 1.23 (0.77 - 1.97) |
| Smoking                         |                    |                    |                     |                    |                    |
| Current smoker                  | 0.55 (0.47 - 0.64) | 0.69 (0.58 - 0.82) | 0.79 (0.64 - 0.97)  | 0.74 (0.58 - 0.95) | 0.81 (0.61 - 1.08) |
| Ex-smoker                       | 1.07 (0.98 - 1.16) | 1.18 (1.08 - 1.29) | 1.16 (1.05 - 1.27)  | 1.11 (1.00 - 1.23) | 1.16 (1.03 - 1.29) |
| Non-smoker*                     | 1.09 (0.85 - 1.39) | 1.48 (1.18 - 1.87) | 1.37 (1.04 - 1.81)  | 1.29 (0.95 - 1.74) | 1.29 (0.93 - 1.81) |
| Never smoked                    | 1.00               | 1.00               | 1.00                | 1.00               | 1.00               |
| Missing                         | 1.32 (0.49 - 3.53) | 1.82 (0.68 - 4.86) | 4.33 (1.79 - 10.46) | 2.58 (0.83 - 8.08) | 1.89 (0.47 - 7.62) |
| Co-morbidities                  |                    |                    |                     |                    |                    |
| Previous MI                     | 1.13 (0.94 - 1.36) | 1.17 (0.96 - 1.43) | 1.15 (0.91 - 1.46)  | 1.05 (0.81 - 1.36) | 0.98 (0.73 - 1.31) |

|                        |                    |                    |                    |                    |                    |
|------------------------|--------------------|--------------------|--------------------|--------------------|--------------------|
| Previous stroke        | 1.75 (1.51 - 2.02) | 2.03 (1.75 - 2.35) | 2.26 (1.92 - 2.67) | 2.30 (1.94 - 2.74) | 1.92 (1.57 - 2.35) |
| Previous heart failure | 2.10 (1.9 - 2.32)  | 1.99 (1.79 - 2.22) | 1.99 (1.76 - 2.25) | 2.13 (1.87 - 2.42) | 2.36 (2.05 - 2.71) |

\* This category is used where an individual is not currently a smoker but their history is unknown therefore interpretation of the results is complex.

- indicates that small number of cases in this category meant that it was not possible to calculate a HR with appropriate CI

Table S8: Adjusted hazard ratios for COVID-19 related death in people with Type 2 diabetes stratified by category of body mass index

|                    | <20 kg/m <sup>2</sup><br>HR (95% CI) | 20-24.9 kg/m <sup>2</sup><br>HR (95% CI) | 25-29.9 kg/m <sup>2</sup><br>HR (95% CI) | 30-34.9 kg/m <sup>2</sup><br>HR (95% CI) | 35-39.9 kg/m <sup>2</sup><br>HR (95% CI) | 40+ kg/m <sup>2</sup><br>HR (95% CI) | Missing<br>HR (95% CI) |
|--------------------|--------------------------------------|------------------------------------------|------------------------------------------|------------------------------------------|------------------------------------------|--------------------------------------|------------------------|
| Number of deaths   | 488                                  | 2143                                     | 2962                                     | 2097                                     | 975                                      | 676                                  | 1184                   |
| Sex                |                                      |                                          |                                          |                                          |                                          |                                      |                        |
| Male               | 1.62 (1.33 - 1.96)                   | 1.61 (1.46 - 1.76)                       | 1.75 (1.61 - 1.9)                        | 1.65 (1.5 - 1.81)                        | 1.64 (1.43 - 1.88)                       | 1.56 (1.33 - 1.82)                   | 1.44 (1.28 - 1.63)     |
| Female             | 1.00                                 | 1.00                                     | 1.00                                     | 1.00                                     | 1.00                                     | 1.00                                 | 1.00                   |
| Age                |                                      |                                          |                                          |                                          |                                          |                                      |                        |
| <40                | 0 (0 - 3.32E+137)                    | 0.29 (0.11 - 0.78)                       | 0 (0 - 6.787E+56)                        | 0.25 (0.11 - 0.56)                       | 0.2 (0.07 - 0.55)                        | 0.31 (0.15 - 0.65)                   | 0.16 (0.04 - 0.65)     |
| 40-49              | 0.23 (0.03 - 1.74)                   | 0.16 (0.08 - 0.35)                       | 0.18 (0.11 - 0.29)                       | 0.21 (0.13 - 0.35)                       | 0.22 (0.12 - 0.39)                       | 0.51 (0.34 - 0.75)                   | 0.27 (0.13 - 0.53)     |
| 50-59              | 0.44 (0.15 - 1.33)                   | 0.51 (0.37 - 0.71)                       | 0.38 (0.3 - 0.48)                        | 0.53 (0.43 - 0.66)                       | 0.61 (0.47 - 0.78)                       | 0.64 (0.5 - 0.83)                    | 0.56 (0.39 - 0.8)      |
| 60-69              | 1.00                                 | 1.00                                     | 1.00                                     | 1.00                                     | 1.00                                     | 1.00                                 | 1.00                   |
| 70-79              | 3.01 (1.72 - 5.26)                   | 2.39 (1.97 - 2.9)                        | 1.99 (1.74 - 2.28)                       | 1.93 (1.68 - 2.22)                       | 1.46 (1.22 - 1.75)                       | 1.46 (1.18 - 1.79)                   | 2.68 (2.12 - 3.38)     |
| ≥80                | 5.86 (3.43 - 10.03)                  | 5.1 (4.24 - 6.14)                        | 5.07 (4.45 - 5.78)                       | 4.34 (3.77 - 4.99)                       | 3.19 (2.64 - 3.85)                       | 2.91 (2.29 - 3.69)                   | 5.64 (4.51 - 7.06)     |
| Deprivation        |                                      |                                          |                                          |                                          |                                          |                                      |                        |
| Most deprived      | 0.9 (0.69 - 1.16)                    | 0.88 (0.78 - 0.99)                       | 0.81 (0.73 - 0.9)                        | 0.94 (0.83 - 1.06)                       | 0.97 (0.81 - 1.15)                       | 0.91 (0.74 - 1.13)                   | 0.82 (0.69 - 0.97)     |
| 2nd most deprived  | 0.77 (0.58 - 1.02)                   | 0.69 (0.6 - 0.79)                        | 0.69 (0.61 - 0.77)                       | 0.78 (0.69 - 0.89)                       | 0.81 (0.67 - 0.98)                       | 0.87 (0.69 - 1.1)                    | 0.76 (0.64 - 0.91)     |
| 3rd most deprived  | 0.66 (0.49 - 0.88)                   | 0.66 (0.57 - 0.76)                       | 0.6 (0.53 - 0.67)                        | 0.75 (0.65 - 0.87)                       | 0.7 (0.57 - 0.87)                        | 1.01 (0.8 - 1.29)                    | 0.77 (0.64 - 0.92)     |
| 2nd Least deprived | 0.67 (0.5 - 0.91)                    | 0.66 (0.57 - 0.76)                       | 0.62 (0.55 - 0.7)                        | 0.8 (0.69 - 0.92)                        | 0.79 (0.63 - 0.99)                       | 1.02 (0.78 - 1.34)                   | 0.56 (0.46 - 0.69)     |
| Least deprived     | 1.00                                 | 1.00                                     | 1.00                                     | 1.00                                     | 1.00                                     | 1.00                                 | 1.00                   |
| Missing            | -                                    | 0.95 (0.13 - 6.78)                       | 0.94 (0.23 - 3.78)                       | 1.12 (0.16 - 8.03)                       | 2.39 (0.33 - 17.22)                      | 0 (0 - 1.29E+115)                    | 1.95 (0.48 - 7.88)     |
| Region             |                                      |                                          |                                          |                                          |                                          |                                      |                        |
| London             | 1.84 (1.31 - 2.61)                   | 1.62 (1.37 - 1.91)                       | 1.68 (1.46 - 1.93)                       | 1.98 (1.68 - 2.34)                       | 1.93 (1.5 - 2.5)                         | 1.83 (1.35 - 2.47)                   | 1.39 (1.17 - 1.67)     |
| South West         | 0.67 (0.43 - 1.06)                   | 0.65 (0.52 - 0.81)                       | 0.64 (0.53 - 0.76)                       | 0.54 (0.43 - 0.68)                       | 0.67 (0.48 - 0.93)                       | 0.71 (0.48 - 1.04)                   | 0.61 (0.47 - 0.81)     |
| South East         | 1.00                                 | 1.00                                     | 1.00                                     | 1.00                                     | 1.00                                     | 1.00                                 | 1.00                   |
| Midlands           | 0.95 (0.68 - 1.35)                   | 1.12 (0.96 - 1.32)                       | 1.01 (0.88 - 1.15)                       | 1.12 (0.95 - 1.31)                       | 1.16 (0.91 - 1.49)                       | 1.24 (0.94 - 1.65)                   | 0.78 (0.64 - 0.94)     |
| East of England    | 1.13 (0.78 - 1.65)                   | 1.01 (0.84 - 1.22)                       | 0.9 (0.77 - 1.06)                        | 1.09 (0.9 - 1.31)                        | 1.2 (0.91 - 1.58)                        | 1.11 (0.8 - 1.54)                    | 0.62 (0.47 - 0.81)     |
| North West         | 1.42 (1 - 2.02)                      | 1.27 (1.07 - 1.5)                        | 1.18 (1.02 - 1.36)                       | 1.13 (0.95 - 1.35)                       | 1.33 (1.02 - 1.73)                       | 1.25 (0.92 - 1.71)                   | 0.92 (0.76 - 1.13)     |
| North East         | 1.02 (0.71 - 1.47)                   | 1.03 (0.87 - 1.22)                       | 0.93 (0.8 - 1.07)                        | 1.06 (0.89 - 1.26)                       | 1.01 (0.78 - 1.31)                       | 0.93 (0.69 - 1.27)                   | 0.9 (0.72 - 1.14)      |
| Missing            | -                                    | -                                        | -                                        | -                                        | -                                        | -                                    | -                      |
| Ethnic group       |                                      |                                          |                                          |                                          |                                          |                                      |                        |
| Asian              | 0.64 (0.47 - 0.87)                   | 0.82 (0.71 - 0.94)                       | 1.35 (1.2 - 1.52)                        | 1.41 (1.21 - 1.65)                       | 1.91 (1.52 - 2.4)                        | 1.9 (1.42 - 2.54)                    | 0.6 (0.48 - 0.76)      |
| Black              | 0.84 (0.53 - 1.32)                   | 1.26 (1.04 - 1.51)                       | 1.64 (1.42 - 1.91)                       | 2.12 (1.79 - 2.5)                        | 2.05 (1.59 - 2.64)                       | 2.44 (1.82 - 3.28)                   | 1.38 (1.09 - 1.74)     |
| Mixed              | 0.7 (0.26 - 1.9)                     | 1.03 (0.69 - 1.54)                       | 1.18 (0.83 - 1.68)                       | 1.83 (1.28 - 2.61)                       | 2.28 (1.41 - 3.67)                       | 2.21 (1.2 - 4.06)                    | 0.76 (0.42 - 1.39)     |
| Other              | 0.37 (0.12 - 1.16)                   | 0.75 (0.51 - 1.1)                        | 1.01 (0.74 - 1.36)                       | 1.48 (1.09 - 1.99)                       | 0.89 (0.5 - 1.58)                        | 2.02 (1.25 - 3.25)                   | 0.68 (0.41 - 1.13)     |
| White              | 1.00                                 | 1.00                                     | 1.00                                     | 1.00                                     | 1.00                                     | 1.00                                 | 1.00                   |
| Missing            | 0.57 (0.39 - 0.83)                   | 0.67 (0.57 - 0.79)                       | 0.7 (0.61 - 0.81)                        | 0.87 (0.75 - 1.02)                       | 1.03 (0.83 - 1.29)                       | 0.95 (0.72 - 1.26)                   | 0.93 (0.79 - 1.09)     |
| HbA1c              |                                      |                                          |                                          |                                          |                                          |                                      |                        |
| <48 mmol/mol       | 1.27 (0.96 - 1.67)                   | 1.2 (1.05 - 1.36)                        | 1.11 (1 - 1.24)                          | 1.11 (1 - 1.24)                          | 1.09 (0.89 - 1.34)                       | 0.91 (0.7 - 1.19)                    | 0.99 (0.82 - 1.19)     |
| 48-53 mmol/mol     | 1.00                                 | 1.00                                     | 1.00                                     | 1.00                                     | 1.00                                     | 1.00                                 | 1.00                   |
| 54-58 mmol/mol     | 0.87 (0.57 - 1.32)                   | 0.96 (0.81 - 1.14)                       | 1.05 (0.92 - 1.21)                       | 1.05 (0.92 - 1.21)                       | 1.13 (0.9 - 1.43)                        | 1.32 (1 - 1.74)                      | 1.02 (0.8 - 1.31)      |
| 59-74 mmol/mol     | 1.44 (1.02 - 2.02)                   | 1.25 (1.08 - 1.46)                       | 1.22 (1.09 - 1.38)                       | 1.22 (1.09 - 1.38)                       | 1.12 (0.91 - 1.38)                       | 1.17 (0.91 - 1.5)                    | 1.24 (1 - 1.53)        |

|                            |                    |                    |                    |                    |                    |                     |                    |
|----------------------------|--------------------|--------------------|--------------------|--------------------|--------------------|---------------------|--------------------|
| 75-85 mmol/mol             | 0.96 (0.52 - 1.78) | 1.32 (1.04 - 1.66) | 1.24 (1.03 - 1.5)  | 1.24 (1.03 - 1.5)  | 1.42 (1.07 - 1.87) | 1.72 (1.26 - 2.35)  | 1.14 (0.82 - 1.57) |
| ≥86 mmol/mol               | 0.95 (0.53 - 1.71) | 1.62 (1.3 - 2.01)  | 1.7 (1.43 - 2.01)  | 1.7 (1.43 - 2.01)  | 1.72 (1.32 - 2.24) | 1.81 (1.34 - 2.45)  | 1.46 (1.09 - 1.95) |
| Missing                    | 1.11 (0.77 - 1.6)  | 1.34 (1.12 - 1.61) | 1.23 (1.04 - 1.46) | 1.23 (1.04 - 1.46) | 1.22 (0.9 - 1.65)  | 1.32 (0.92 - 1.89)  | 0.93 (0.74 - 1.18) |
| Duration of diagnosis      |                    |                    |                    |                    |                    |                     |                    |
| <1 year                    | 0.76 (0.18 - 3.13) | 0.75 (0.33 - 1.69) | 1.19 (0.7 - 2)     | 1.19 (0.7 - 2)     | 0.66 (0.24 - 1.79) | 1.07 (0.39 - 2.95)  | 1.13 (0.59 - 2.17) |
| 1-2 years                  | 0.56 (0.34 - 0.92) | 0.88 (0.69 - 1.11) | 0.91 (0.75 - 1.1)  | 0.91 (0.75 - 1.1)  | 0.82 (0.62 - 1.09) | 1.14 (0.81 - 1.61)  | 1.18 (0.89 - 1.58) |
| 3-4 years                  | 1.00               | 1.00               | 1.00               | 1.00               | 1.00               | 1.00                | 1.00               |
| 5-9 years                  | 0.69 (0.48 - 1)    | 1 (0.83 - 1.21)    | 1.03 (0.88 - 1.19) | 1.03 (0.88 - 1.19) | 0.88 (0.7 - 1.11)  | 1.14 (0.85 - 1.54)  | 1.01 (0.79 - 1.29) |
| 10-14 years                | 0.8 (0.57 - 1.14)  | 1.24 (1.03 - 1.49) | 1 (0.86 - 1.16)    | 1 (0.86 - 1.16)    | 0.8 (0.63 - 1.02)  | 1.24 (0.91 - 1.68)  | 1.16 (0.91 - 1.48) |
| 15-19 years                | 0.87 (0.61 - 1.23) | 1.32 (1.09 - 1.59) | 1.24 (1.06 - 1.44) | 1.24 (1.06 - 1.44) | 0.92 (0.72 - 1.17) | 1.25 (0.91 - 1.71)  | 1.25 (0.97 - 1.6)  |
| ≥20 years                  | 1.04 (0.73 - 1.48) | 1.43 (1.18 - 1.74) | 1.32 (1.13 - 1.55) | 1.32 (1.13 - 1.55) | 0.92 (0.71 - 1.2)  | 1.59 (1.15 - 2.22)  | 1.46 (1.13 - 1.89) |
| eGFR                       |                    |                    |                    |                    |                    |                     |                    |
| ≥90                        | 1.00               | 1.00               | 1.00               | 1.00               | 1.00               | 1.00                | 1.00               |
| 60-89                      | 1.11 (0.86 - 1.43) | 0.93 (0.82 - 1.05) | 0.96 (0.86 - 1.07) | 1.11 (0.98 - 1.26) | 1.32 (1.09 - 1.59) | 0.97 (0.79 - 1.2)   | 0.98 (0.82 - 1.16) |
| 45-59                      | 1.52 (1.13 - 2.03) | 1.24 (1.08 - 1.43) | 1.36 (1.2 - 1.55)  | 1.62 (1.39 - 1.89) | 1.66 (1.32 - 2.1)  | 1.4 (1.07 - 1.81)   | 1.16 (0.95 - 1.42) |
| 30-44                      | 1.91 (1.39 - 2.62) | 1.44 (1.22 - 1.69) | 1.77 (1.54 - 2.03) | 2.11 (1.79 - 2.49) | 2.52 (1.97 - 3.23) | 1.58 (1.17 - 2.12)  | 1.46 (1.18 - 1.81) |
| 15-29                      | 2.21 (1.41 - 3.47) | 2.19 (1.78 - 2.7)  | 2.35 (1.96 - 2.81) | 2.23 (1.78 - 2.8)  | 3.58 (2.64 - 4.84) | 2.35 (1.64 - 3.35)  | 1.87 (1.41 - 2.46) |
| <15                        | 3.08 (1.41 - 6.72) | 4.47 (3.39 - 5.9)  | 4.19 (3.27 - 5.37) | 5.24 (3.93 - 6.98) | 9.39 (6.6 - 13.36) | 5.47 (3.53 - 8.46)  | 4.34 (3.05 - 6.18) |
| Missing                    | 1.42 (0.84 - 2.4)  | 1.37 (1 - 1.88)    | 1.59 (1.16 - 2.18) | 1.04 (0.65 - 1.66) | 0.9 (0.41 - 1.96)  | 0.24 (0.06 - 0.96)  | 0.52 (0.38 - 0.69) |
| Systolic blood pressure    |                    |                    |                    |                    |                    |                     |                    |
| ≤140 mmHg                  | 1.00               | 1.00               | 1.00               | 1.00               | 1.00               | 1.00                | 1.00               |
| >140 mmHg                  | 0.79 (0.63 - 1)    | 0.84 (0.76 - 0.93) | 0.85 (0.78 - 0.92) | 0.94 (0.85 - 1.04) | 0.86 (0.74 - 0.99) | 1 (0.85 - 1.18)     | 0.74 (0.64 - 0.86) |
| Missing                    | 0.86 (0.61 - 1.22) | 0.71 (0.59 - 0.87) | 0.75 (0.63 - 0.9)  | 0.72 (0.58 - 0.89) | 0.72 (0.53 - 0.99) | 0.72 (0.5 - 1.04)   | 0.76 (0.63 - 0.91) |
| On anti-hypertensive drugs |                    |                    |                    |                    |                    |                     |                    |
| Yes                        | 0.85 (0.68 - 1.08) | 1.05 (0.92 - 1.19) | 1.1 (0.97 - 1.24)  | 1.09 (0.93 - 1.29) | 1.31 (1.01 - 1.71) | 1.36 (0.98 - 1.87)  | 0.97 (0.81 - 1.16) |
| No                         | 1.00               | 1.00               | 1.00               | 1.00               | 1.00               | 1.00                | 1.00               |
| Missing                    | -                  | -                  | -                  | -                  | -                  | -                   | -                  |
| Total cholesterol          |                    |                    |                    |                    |                    |                     |                    |
| <5 mmol/l                  | 1.00               | 1.00               | 1.00               | 1.00               | 1.00               | 1.00                | 1.00               |
| ≥5 mmol/l                  | 1.11 (0.84 - 1.46) | 1.09 (0.95 - 1.24) | 1.04 (0.93 - 1.17) | 0.97 (0.85 - 1.12) | 1.15 (0.95 - 1.38) | 0.83 (0.66 - 1.06)  | 0.96 (0.79 - 1.16) |
| Missing                    | 2.09 (1.63 - 2.67) | 1.91 (1.68 - 2.18) | 1.62 (1.44 - 1.83) | 1.64 (1.42 - 1.89) | 1.54 (1.25 - 1.91) | 1.4 (1.09 - 1.8)    | 1.39 (1.18 - 1.65) |
| On statins                 |                    |                    |                    |                    |                    |                     |                    |
| Yes                        | 0.68 (0.56 - 0.83) | 0.64 (0.58 - 0.71) | 0.67 (0.62 - 0.73) | 0.75 (0.67 - 0.83) | 0.87 (0.74 - 1.03) | 0.9 (0.74 - 1.1)    | 0.79 (0.69 - 0.9)  |
| No                         | 1.00               | 1.00               | 1.00               | 1.00               | 1.00               | 1.00                | 1.00               |
| Missing                    | 0.1 (0.01 - 0.76)  | 0.91 (0.59 - 1.41) | 0.5 (0.3 - 0.85)   | 0.51 (0.26 - 1.03) | 0.56 (0.17 - 1.86) | 0.78 (0.23 - 2.64)  | 0.82 (0.53 - 1.26) |
| Smoking                    |                    |                    |                    |                    |                    |                     |                    |
| Current smoker             | 0.68 (0.49 - 0.95) | 0.67 (0.56 - 0.81) | 0.71 (0.6 - 0.84)  | 0.68 (0.55 - 0.85) | 0.49 (0.35 - 0.69) | 0.67 (0.47 - 0.94)  | 0.72 (0.56 - 0.92) |
| Ex-smoker                  | 0.92 (0.74 - 1.13) | 1.12 (1.02 - 1.23) | 1.21 (1.11 - 1.31) | 1.2 (1.09 - 1.32)  | 1.18 (1.03 - 1.36) | 1.09 (0.92 - 1.28)  | 0.96 (0.85 - 1.1)  |
| Non-smoker*                | 1.39 (0.89 - 2.18) | 1.54 (1.2 - 1.97)  | 1.41 (1.11 - 1.77) | 1.33 (1 - 1.76)    | 0.75 (0.45 - 1.25) | 1.4 (0.9 - 2.18)    | 0.88 (0.61 - 1.27) |
| Never smoked               | 1.00               | 1.00               | 1.00               | 1.00               | 1.00               | 1.00                | 1.00               |
| Missing                    | -                  | 2.18 (0.7 - 6.77)  | 2.99 (1.12 - 7.99) | 1.78 (0.44 - 7.12) | 0 (0 - 1.44E+123)  | 3.31 (0.46 - 23.66) | 2.37 (1.17 - 4.77) |
| Co-morbidities             |                    |                    |                    |                    |                    |                     |                    |
| Previous MI                | 1.07 (0.67 - 1.72) | 1.17 (0.95 - 1.45) | 0.92 (0.76 - 1.12) | 1.14 (0.91 - 1.43) | 1.66 (1.24 - 2.24) | 1.24 (0.82 - 1.86)  | 1.06 (0.76 - 1.48) |
| Previous stroke            | 1.6 (1.18 - 2.18)  | 2.12 (1.83 - 2.46) | 2.09 (1.82 - 2.39) | 2.15 (1.81 - 2.55) | 1.91 (1.45 - 2.52) | 1.98 (1.39 - 2.83)  | 1.66 (1.34 - 2.07) |

|                        |                   |                   |                    |                    |                  |                    |                    |
|------------------------|-------------------|-------------------|--------------------|--------------------|------------------|--------------------|--------------------|
| Previous heart failure | 1.7 (1.33 - 2.18) | 1.92 (1.7 - 2.17) | 2.16 (1.95 - 2.39) | 2.11 (1.88 - 2.38) | 2.02 (1.7 - 2.4) | 2.77 (2.29 - 3.35) | 2.08 (1.79 - 2.42) |
|------------------------|-------------------|-------------------|--------------------|--------------------|------------------|--------------------|--------------------|

\* This category is used where an individual is not currently a smoker but their history is unknown therefore interpretation of the results is complex.

- indicates that small number of cases in this category meant that it was not possible to calculate a HR with appropriate CI
